# Supplementary material for: Synthesis of 4-Aminopyrazol-5-ols as Edaravone Analogs and Their Antioxidant Activity
Source: MDPI journal article supplement (doi:10.3390/molecules27227722), 2022-11-09

# Synthesis of 4-Aminopyrazol-5-ols as Edaravone Analogs and Their Antioxidant Activity

## Table of contents

|                                                                                                                                                                         |    |
|-------------------------------------------------------------------------------------------------------------------------------------------------------------------------|----|
| <b>Figure S1.</b> <sup>1</sup> H NMR spectrum of bis[5-hydroxy-1-phenyl-3-(trifluoromethyl)-1H-pyrazol-4-yl]imine ( <b>2a</b> ).....                                    | 2  |
| <b>Figure S2.</b> <sup>13</sup> C NMR spectrum of bis[5-hydroxy-1-phenyl-3-(trifluoromethyl)-1H-pyrazol-4-yl]imine ( <b>2a</b> ).....                                   | 3  |
| <b>Figure S3.</b> <sup>19</sup> F NMR spectrum of bis[5-hydroxy-1-phenyl-3-(trifluoromethyl)-1H-pyrazol-4-yl]imine ( <b>2a</b> ).....                                   | 4  |
| <b>Figure S4.</b> <sup>1</sup> H NMR spectrum of bis[5-hydroxy-3-(pentafluoroethyl)-1-phenyl-1H-pyrazol-4-yl]imine ( <b>2b</b> ).....                                   | 5  |
| <b>Figure S5.</b> <sup>19</sup> F NMR spectrum of bis[5-hydroxy-3-(pentafluoroethyl)-1-phenyl-1H-pyrazol-4-yl]imine ( <b>2b</b> ).....                                  | 6  |
| <b>Figure S6.</b> <sup>1</sup> H NMR spectrum of N-(5-hydroxy-3-(trifluoromethyl)-1-phenyl-1H-pyrazol-4-yl)acetamide ( <b>3a</b> ).....                                 | 7  |
| <b>Figure S7.</b> <sup>19</sup> F NMR spectrum of N-(5-hydroxy-3-(trifluoromethyl)-1-phenyl-1H-pyrazol-4-yl)acetamide ( <b>3a</b> ).....                                | 8  |
| <b>Figure S8.</b> <sup>1</sup> H NMR spectrum of 4-amino-3-trifluoromethyl-1-phenyl-1H-pyrazol-5-ol hydrochloride ( <b>4a</b> ).....                                    | 9  |
| <b>Figure S9.</b> <sup>1</sup> H NMR spectrum of 4-amino-3-trifluoromethyl-1-phenyl-1H-pyrazol-5-ol hydrochloride ( <b>4a</b> ) after standing overnight.....           | 10 |
| <b>Figure S10.</b> <sup>13</sup> C NMR spectrum of 4-amino-3-trifluoromethyl-1-phenyl-1H-pyrazol-5-ol hydrochloride ( <b>4a</b> ).....                                  | 11 |
| <b>Figure S11.</b> <sup>19</sup> F NMR spectrum of 4-amino-3-trifluoromethyl-1-phenyl-1H-pyrazol-5-ol hydrochloride ( <b>4a</b> ).....                                  | 12 |
| <b>Figure S12.</b> <sup>1</sup> H NMR spectrum of 4-amino-3-pentafluoroethyl-1-phenyl-1H-pyrazol-5-ol hydrate hydrochloride ( <b>4b</b> ).....                          | 13 |
| <b>Figure S13.</b> <sup>1</sup> H NMR spectrum of 4-amino-3-pentafluoroethyl-1-phenyl-1H-pyrazol-5-ol hydrate hydrochloride ( <b>4b</b> ) after standing overnight..... | 14 |
| <b>Figure S14.</b> <sup>13</sup> C NMR spectrum of 4-amino-3-pentafluoroethyl-1-phenyl-1H-pyrazol-5-ol hydrate hydrochloride ( <b>4b</b> ).....                         | 15 |
| <b>Figure S15.</b> <sup>19</sup> F NMR spectrum of 4-amino-3-pentafluoroethyl-1-phenyl-1H-pyrazol-5-ol hydrate hydrochloride ( <b>4b</b> ).....                         | 16 |
| <b>Figure S16.</b> <sup>1</sup> H NMR spectrum of 5-hydroxy-1-phenyl-3-nonafluorobutyl-1H-pyrazol-4-ammonium hydrochloride ( <b>4c</b> ).....                           | 17 |
| <b>Figure S17.</b> <sup>19</sup> F NMR spectrum of 5-hydroxy-1-phenyl-3-nonafluorobutyl-1H-pyrazol-4-ammonium hydrochloride ( <b>4c</b> ).....                          | 18 |
| <b>Figure S18.</b> <sup>1</sup> H NMR spectrum of 4-amino-3-methyl-1-phenyl-1H-pyrazol-5-ol hydrochloride hydrate ( <b>4d</b> ).....                                    | 19 |
| <b>Figure S19.</b> <sup>13</sup> C NMR spectrum of 4-amino-3-methyl-1-phenyl-1H-pyrazol-5-ol hydrochloride hydrate ( <b>4d</b> ).....                                   | 20 |
| <b>Figure S20.</b> <sup>1</sup> H NMR spectrum of 4-amino-3-trifluoromethyl-1H-pyrazol-5-ol hydrochloride ( <b>4e</b> ).....                                            | 21 |
| <b>Figure S21.</b> <sup>13</sup> C NMR spectrum of 4-amino-3-trifluoromethyl-1H-pyrazol-5-ol hydrochloride ( <b>4e</b> ).....                                           | 22 |
| <b>Figure S22.</b> <sup>19</sup> F NMR spectrum of 4-amino-3-trifluoromethyl-1H-pyrazol-5-ol hydrochloride ( <b>4e</b> ).....                                           | 23 |
| <b>Figure S23.</b> <sup>1</sup> H NMR spectrum of 4-amino-3-(1,1,2,2-tetrafluoroethyl)-1H-pyrazol-5-ol hydrate hydrochloride ( <b>4f</b> ).....                         | 24 |
| <b>Figure S24.</b> <sup>19</sup> F NMR spectrum of 4-amino-3-(1,1,2,2-tetrafluoroethyl)-1H-pyrazol-5-ol hydrate hydrochloride ( <b>4f</b> ).....                        | 25 |
| <b>Figure S25.</b> <sup>1</sup> H NMR spectrum of 4-amino-3-(pentafluoroethyl)-1H-pyrazol-5-ol hydrate hydrochloride ( <b>4g</b> ).....                                 | 26 |
| <b>Figure S26.</b> <sup>19</sup> F NMR spectrum of 4-amino-3-(pentafluoroethyl)-1H-pyrazol-5-ol hydrate hydrochloride ( <b>4g</b> ).....                                | 27 |
| <b>Figure S27.</b> <sup>1</sup> H NMR spectrum of 4-amino-3-(heptafluoropropyl)-1H-pyrazol-5-ol hydrate hydrochloride ( <b>4h</b> ).....                                | 28 |
| <b>Figure S28.</b> <sup>19</sup> F NMR spectrum of 4-amino-3-(heptafluoropropyl)-1H-pyrazol-5-ol hydrate hydrochloride ( <b>4h</b> ).....                               | 29 |
| <b>Figure S29.</b> <sup>1</sup> H NMR spectrum of 4-amino-3-(nonafluorobutyl)-1H-pyrazol-5-ol hydrate hydrochloride ( <b>4i</b> ).....                                  | 30 |
| <b>Figure S30.</b> <sup>19</sup> F NMR spectrum of 4-amino-3-(nonafluorobutyl)-1H-pyrazol-5-ol hydrate hydrochloride ( <b>4i</b> ).....                                 | 31 |
| <b>Figure S31.</b> <sup>1</sup> H NMR spectrum of 4-amino-3-methyl-1H-pyrazol-5-ol hydrochloride ( <b>4j</b> ).....                                                     | 32 |
| <b>Figure S32.</b> <sup>13</sup> C NMR spectrum of 4-amino-3-methyl-1H-pyrazol-5-ol hydrochloride ( <b>4j</b> ).....                                                    | 33 |

Figure S1.  $^1\text{H}$  NMR spectrum of bis[5-hydroxy-1-phenyl-3-(trifluoromethyl)-1H-pyrazol-4-yl]imine (2a).

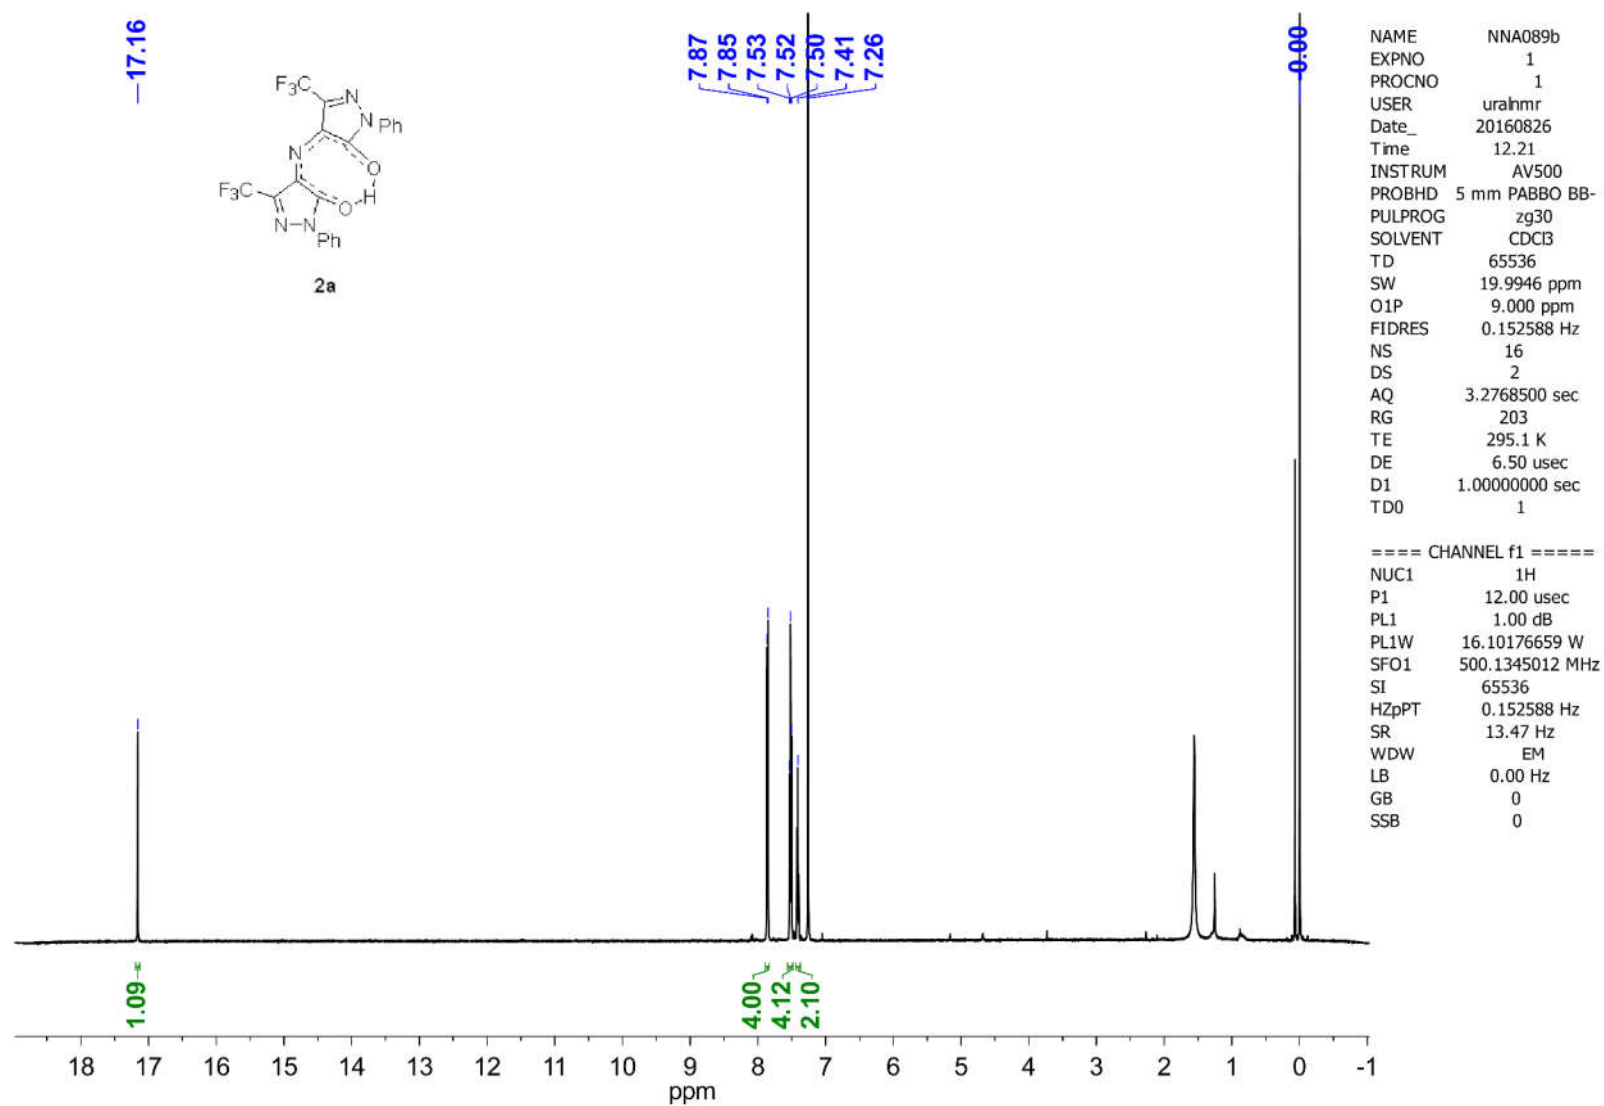

**Figure S2.**  $^{13}\text{C}$  NMR spectrum of bis[5-hydroxy-1-phenyl-3-(trifluoromethyl)-1H-pyrazol-4-yl]imine (**2a**).

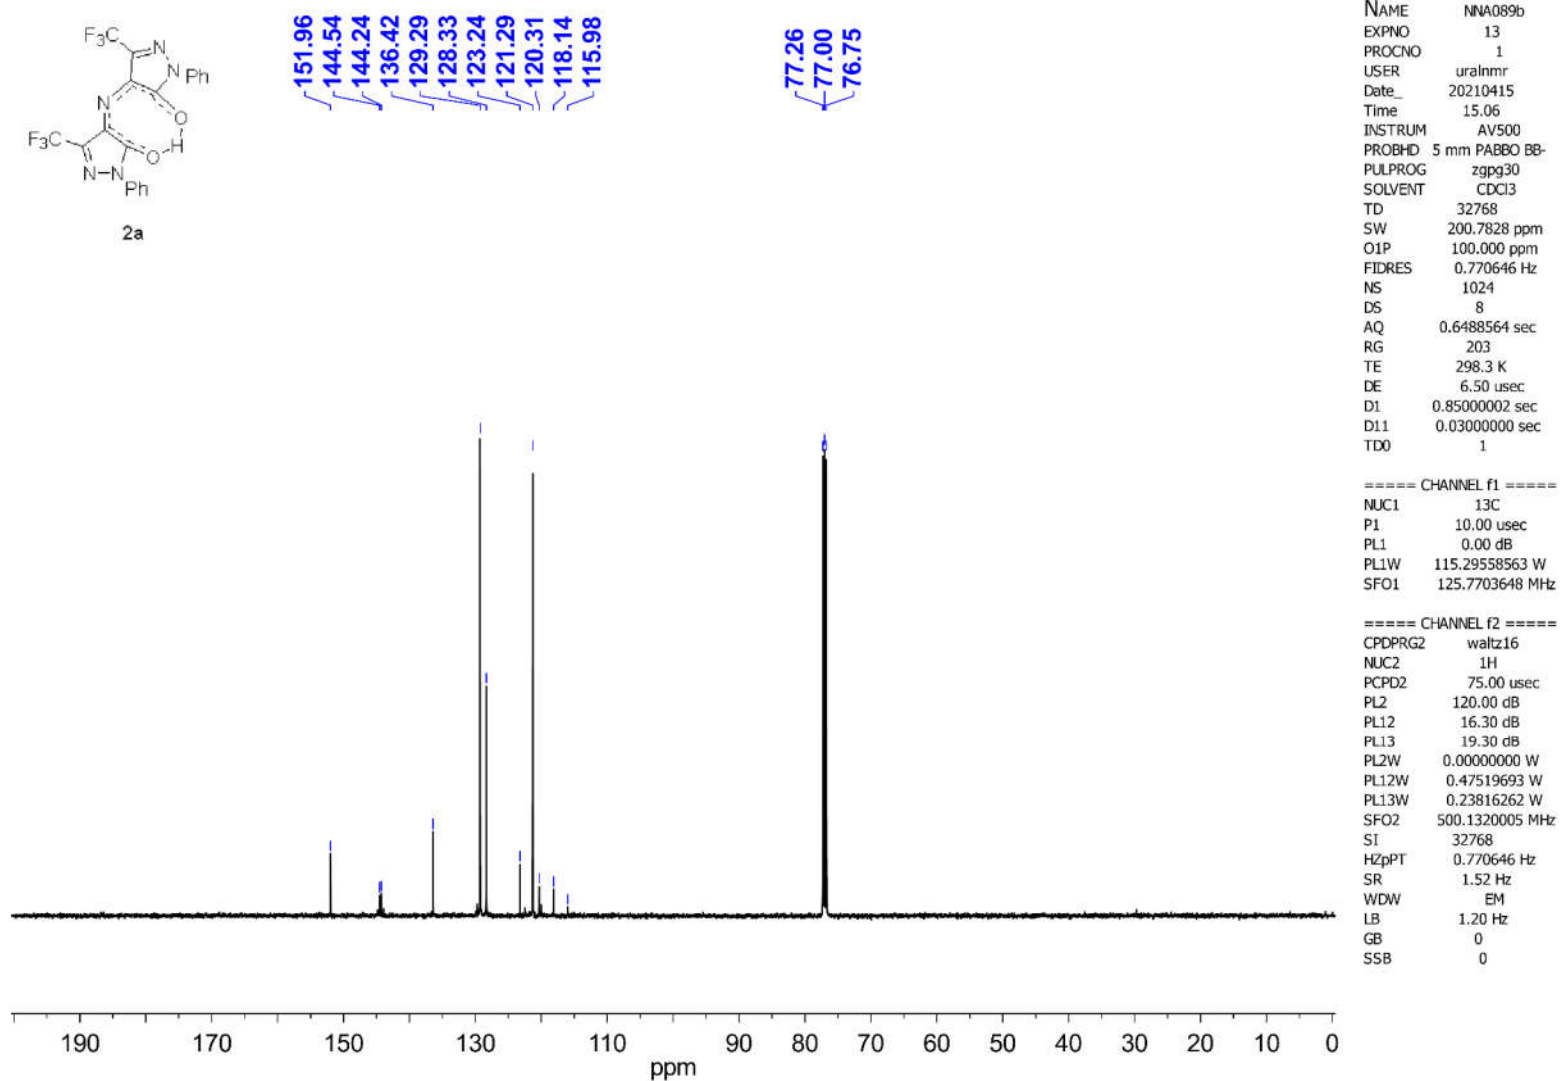

**Figure S3.**  $^{19}\text{F}$  NMR spectrum of bis[5-hydroxy-1-phenyl-3-(trifluoromethyl)-1H-pyrazol-4-yl]imine (**2a**).

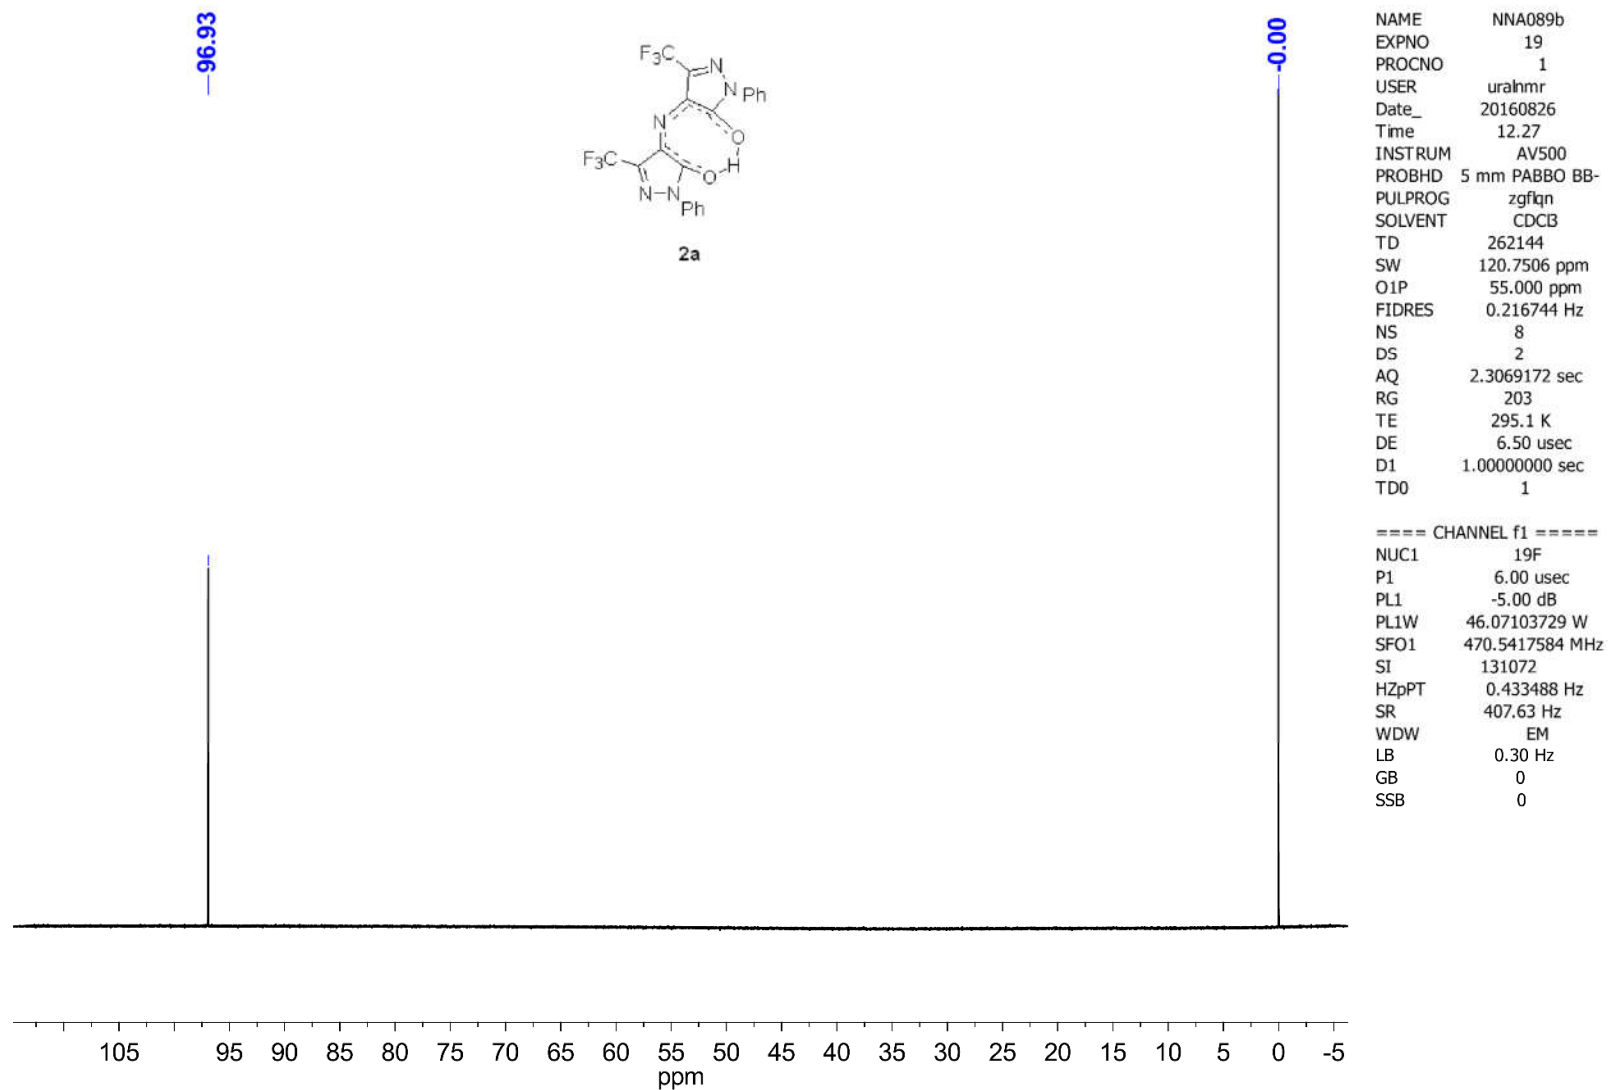

**Figure S4.**  $^1\text{H}$  NMR spectrum of bis[5-hydroxy-3-(pentafluoroethyl)-1-phenyl-1H-pyrazol-4-yl]imine (**2b**).

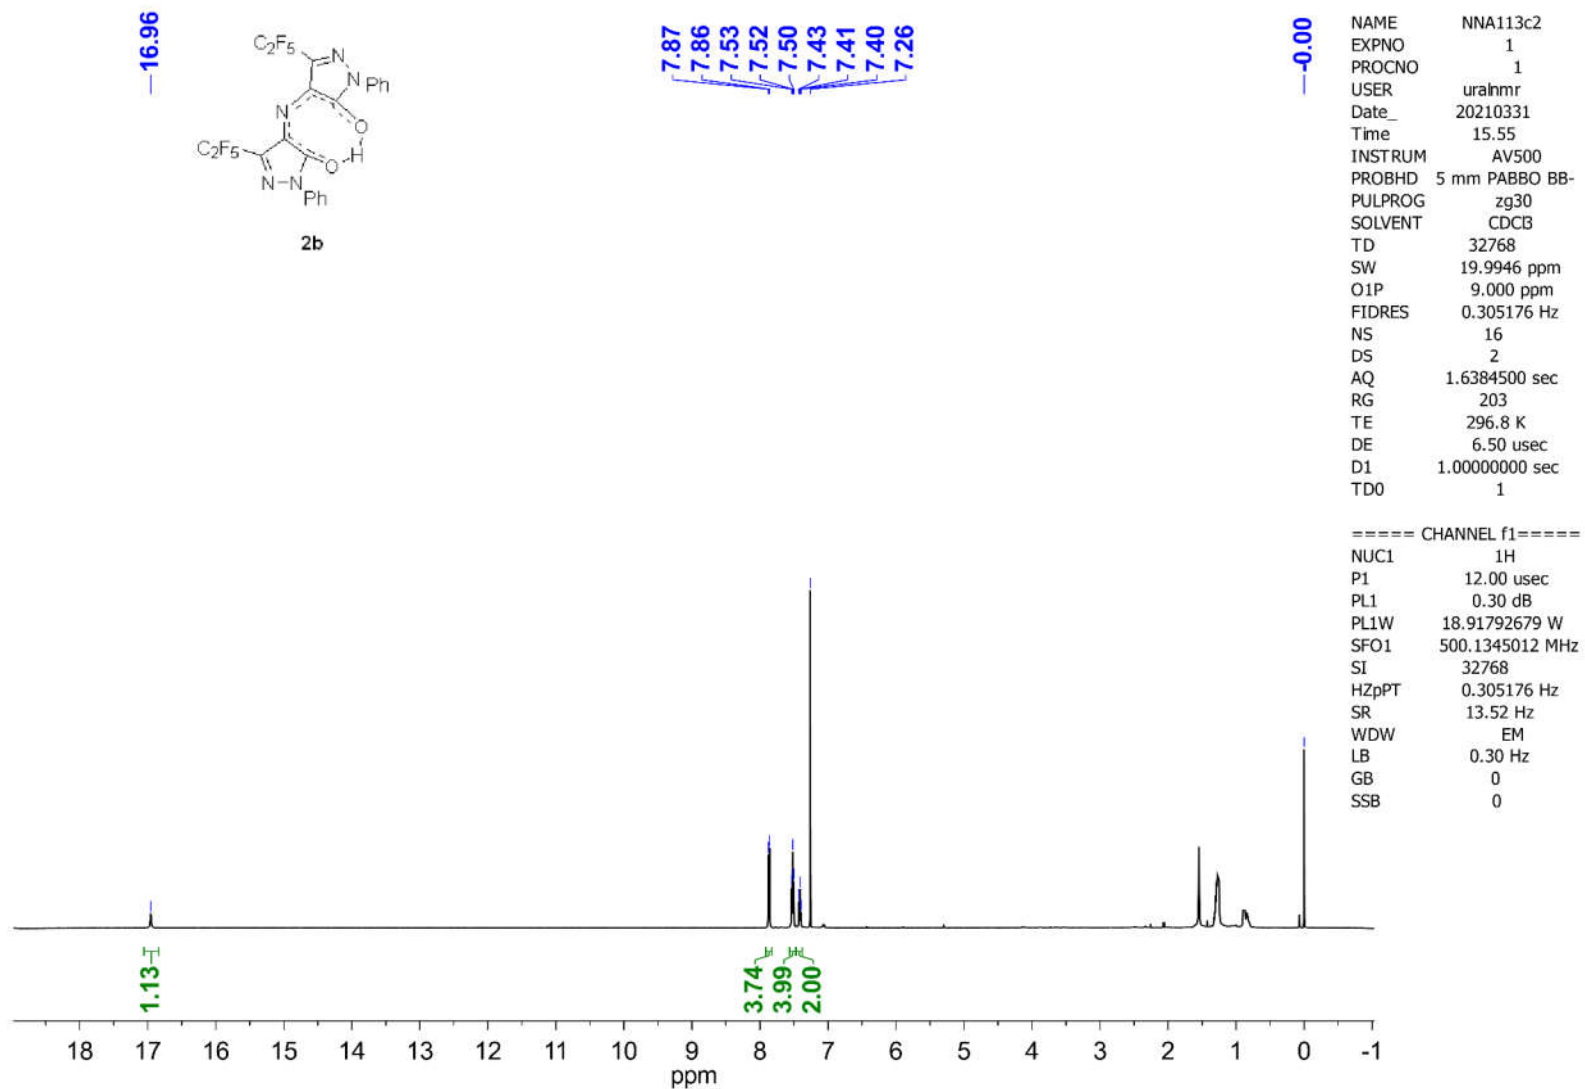

**Figure S5.**  $^{19}\text{F}$  NMR spectrum of bis[5-hydroxy-3-(pentafluoroethyl)-1-phenyl-1H-pyrazol-4-yl]imine (**2b**).

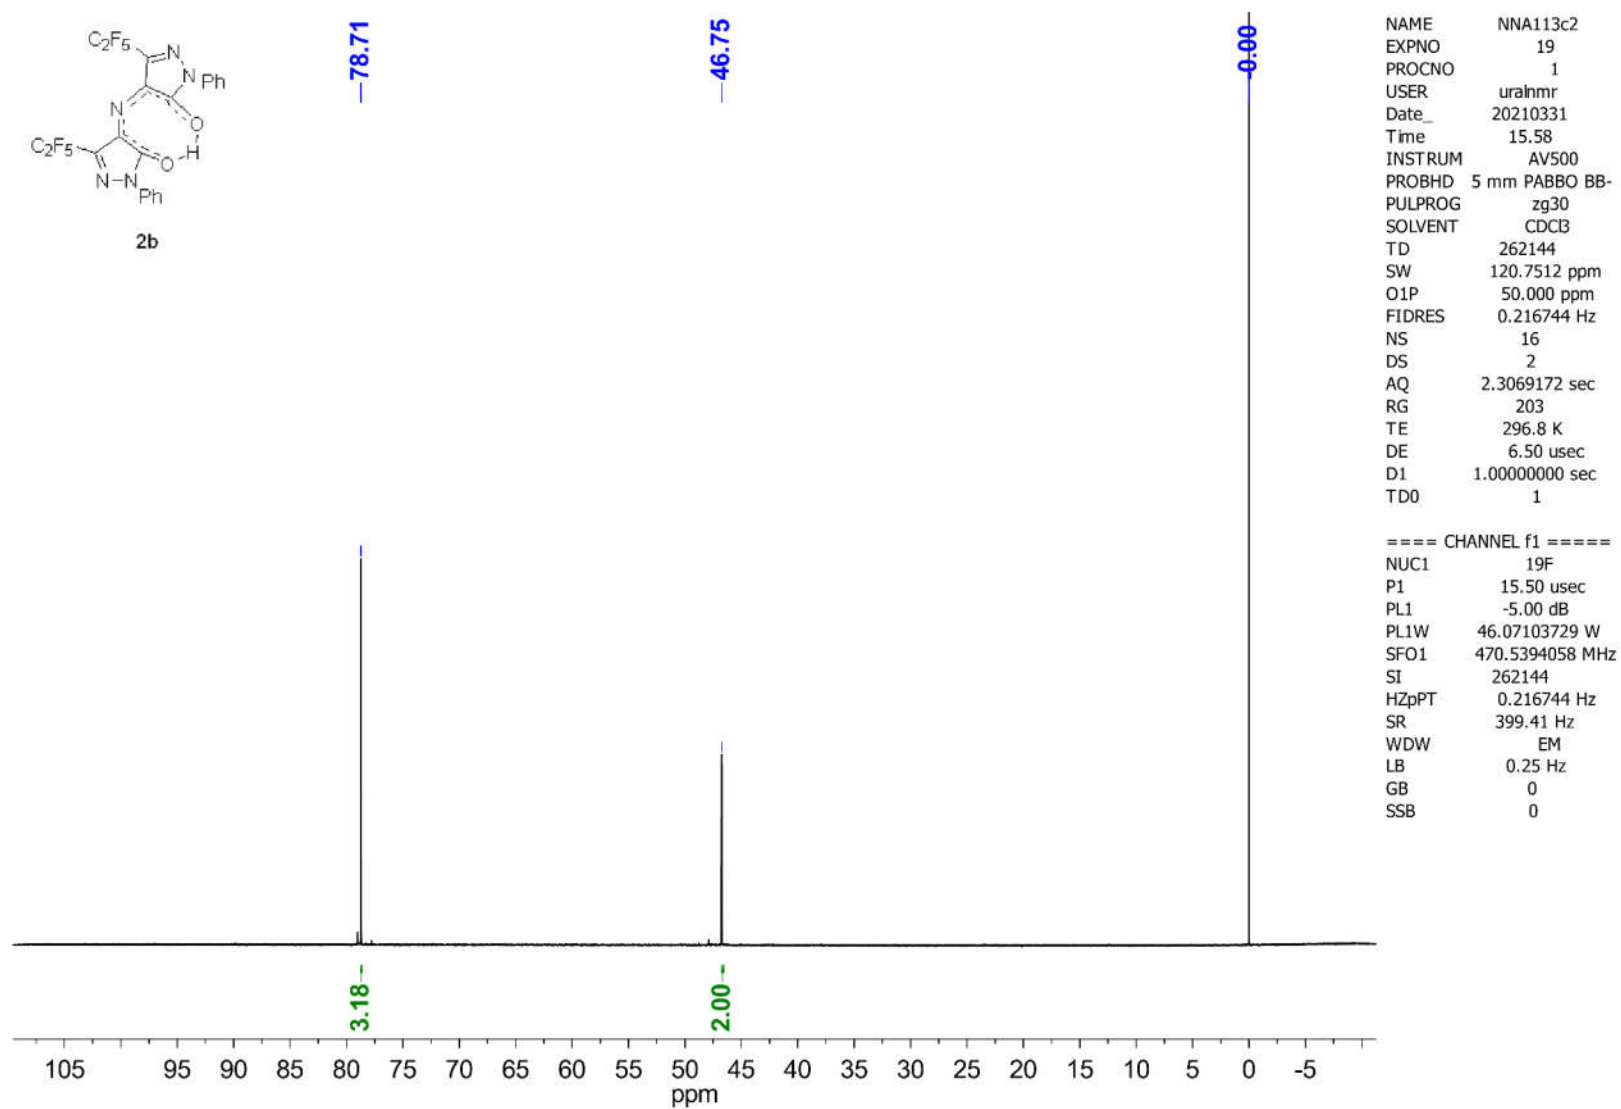

**Figure S6.**  $^1\text{H}$  NMR spectrum of N-(5-hydroxy-3-(trifluoromethyl)-1-phenyl-1H-pyrazol-4-yl)acetamide (**3a**).

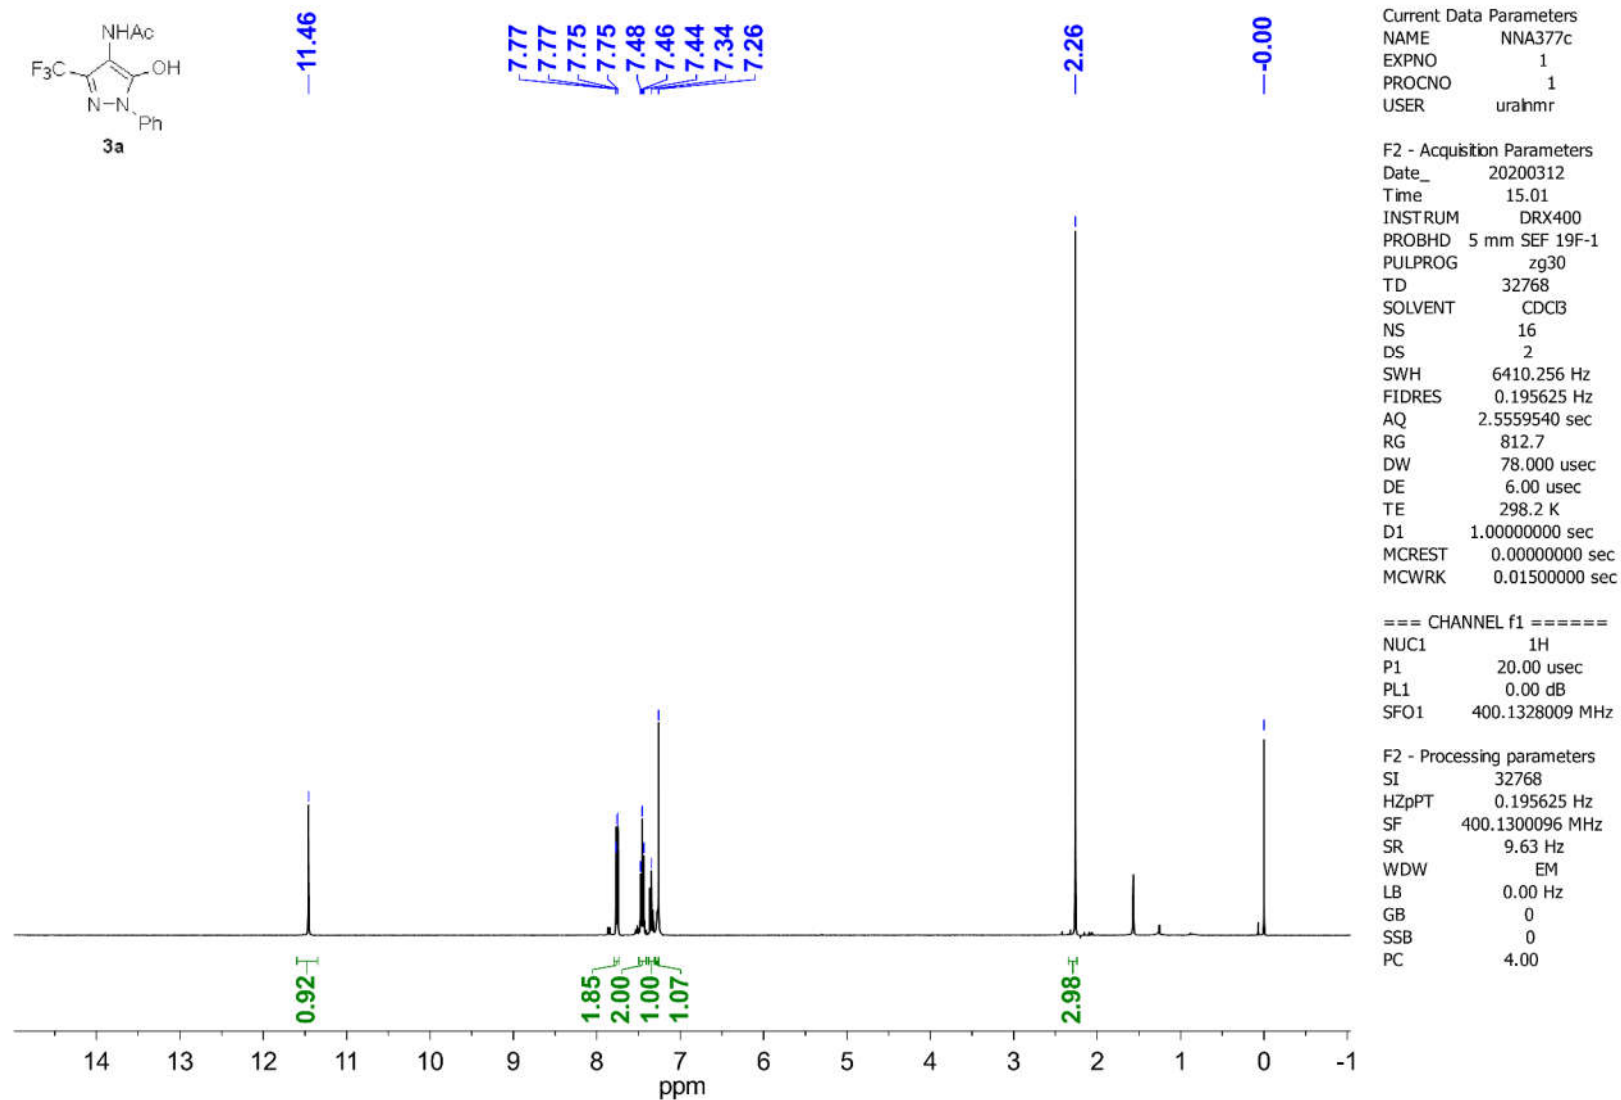

**Figure S7.**  $^{19}\text{F}$  NMR spectrum of N-(5-hydroxy-3-(trifluoromethyl)-1-phenyl-1H-pyrazol-4-yl)acetamide (**3a**).

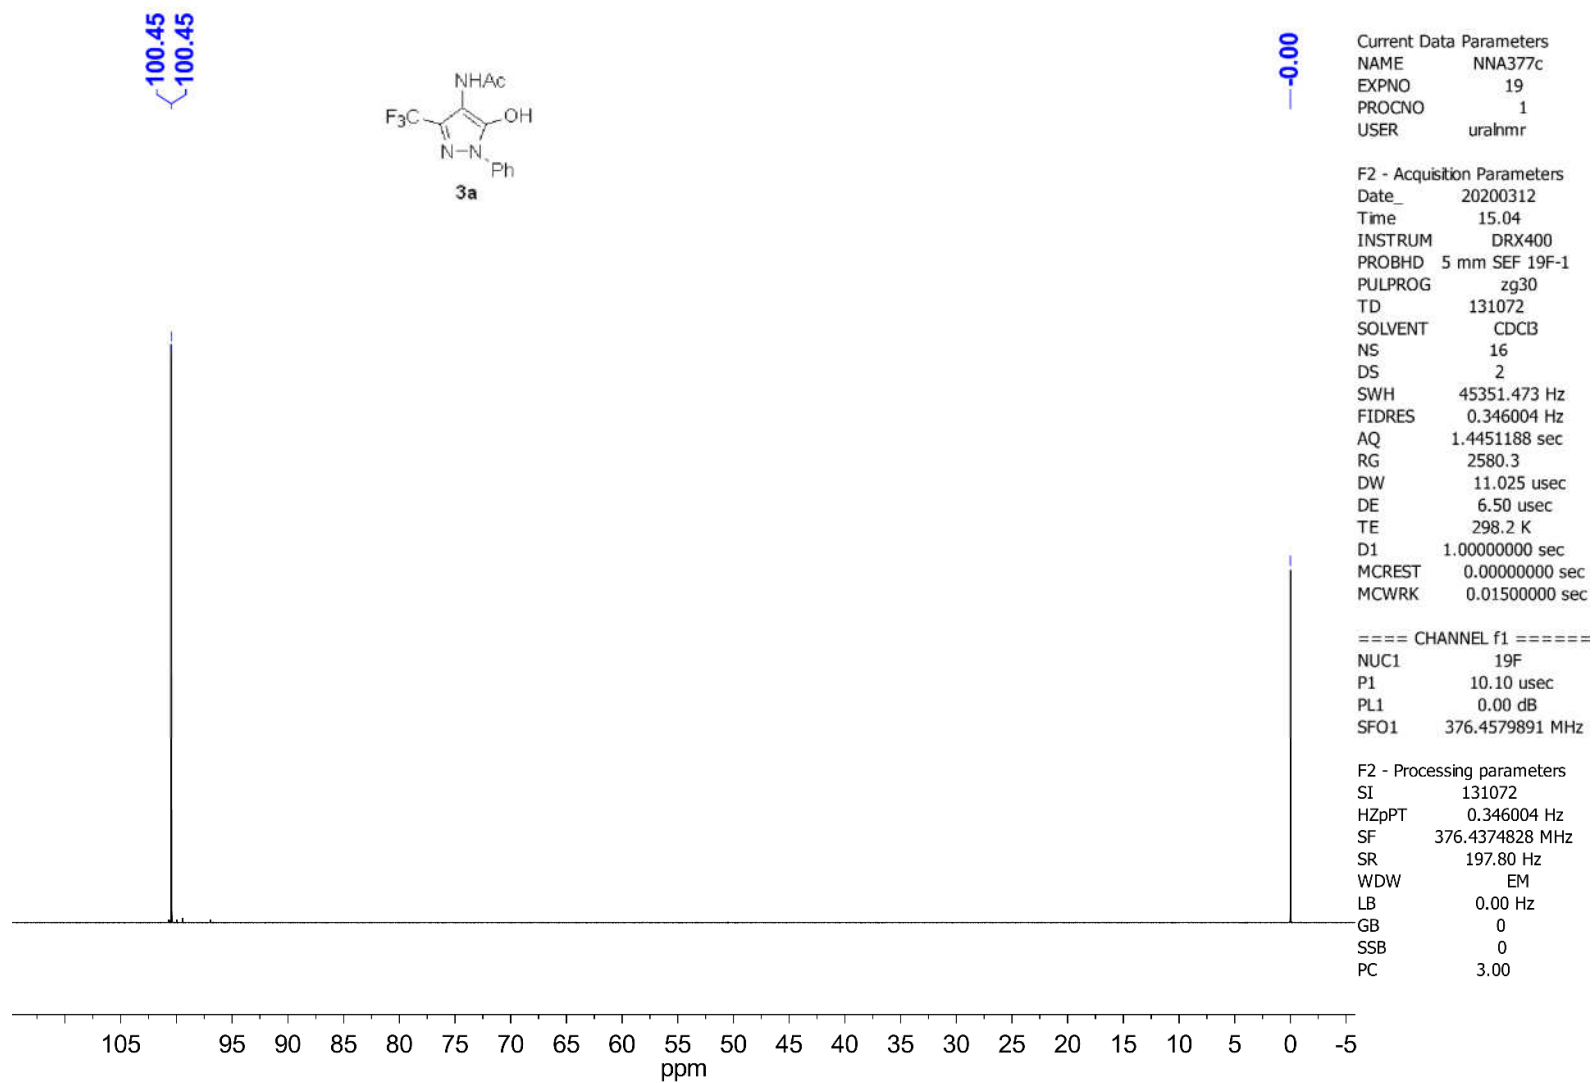

**Figure S8.**  $^1\text{H}$  NMR spectrum of 4-amino-3-trifluoromethyl-1-phenyl-1H-pyrazol-5-ol hydrochloride (**4a**).

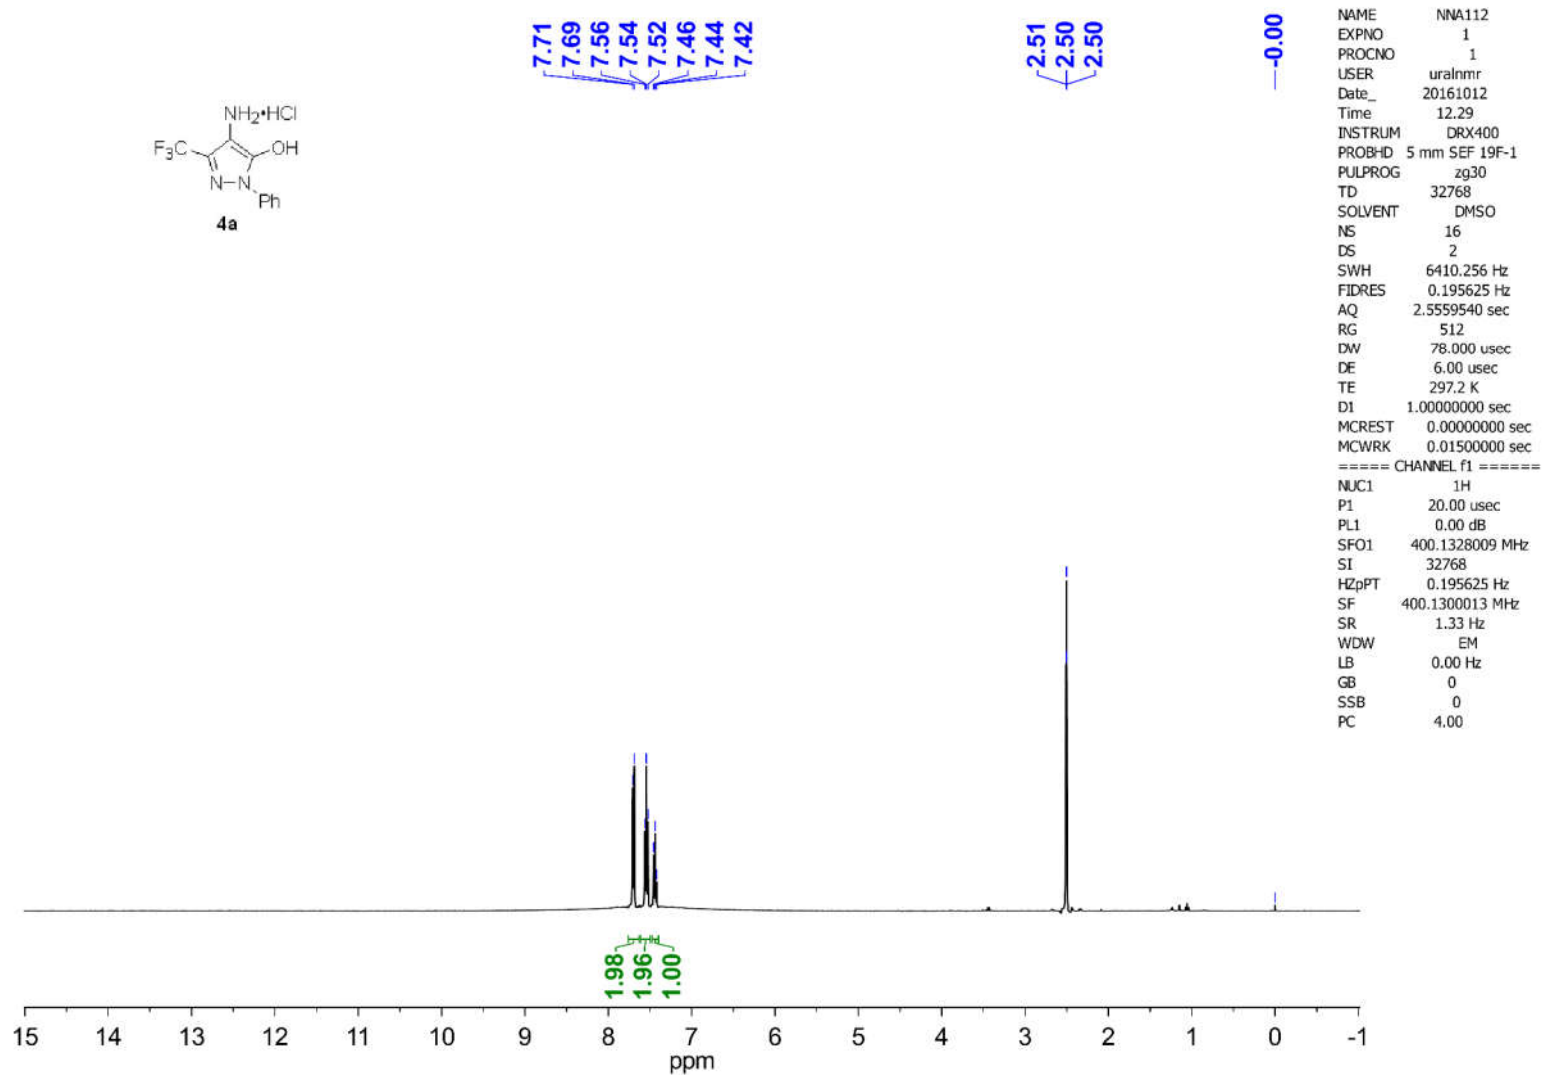

**Figure S9.**  $^1\text{H}$  NMR spectrum of 4-amino-3-trifluoromethyl-1-phenyl-1H-pyrazol-5-ol hydrochloride (**4a**) after standing overnight.

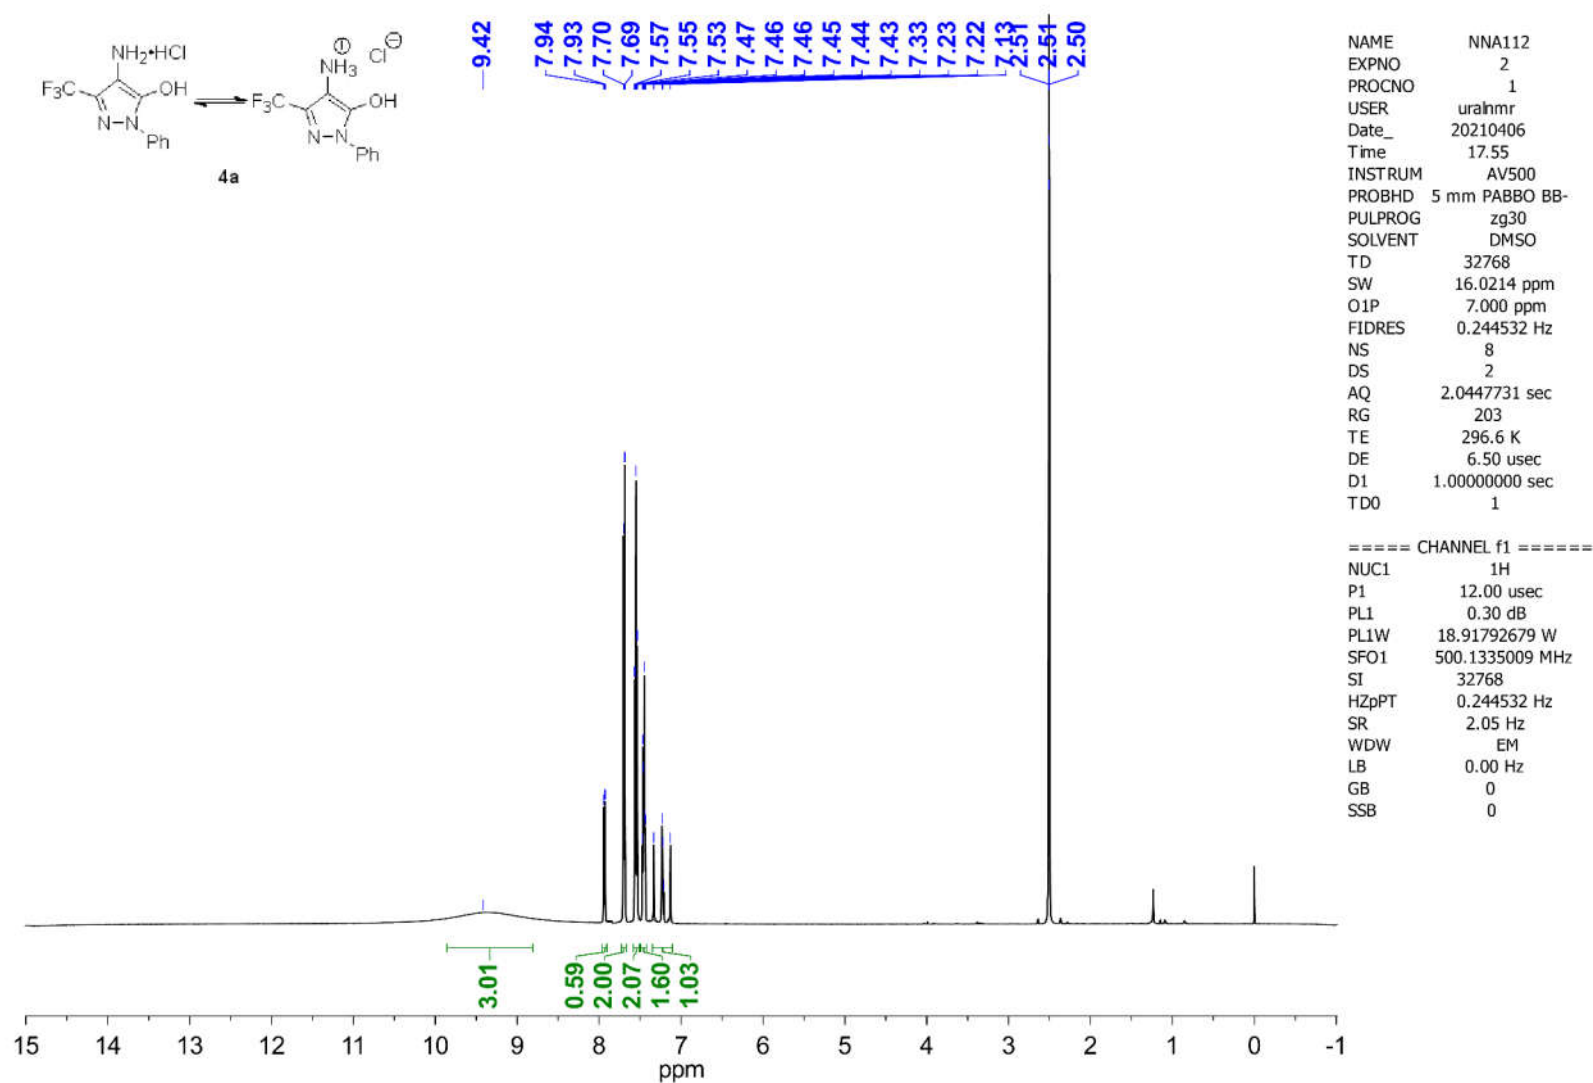

**Figure S10.**  $^{13}\text{C}$  NMR spectrum of 4-amino-3-trifluoromethyl-1-phenyl-1H-pyrazol-5-ol hydrochloride (**4a**).

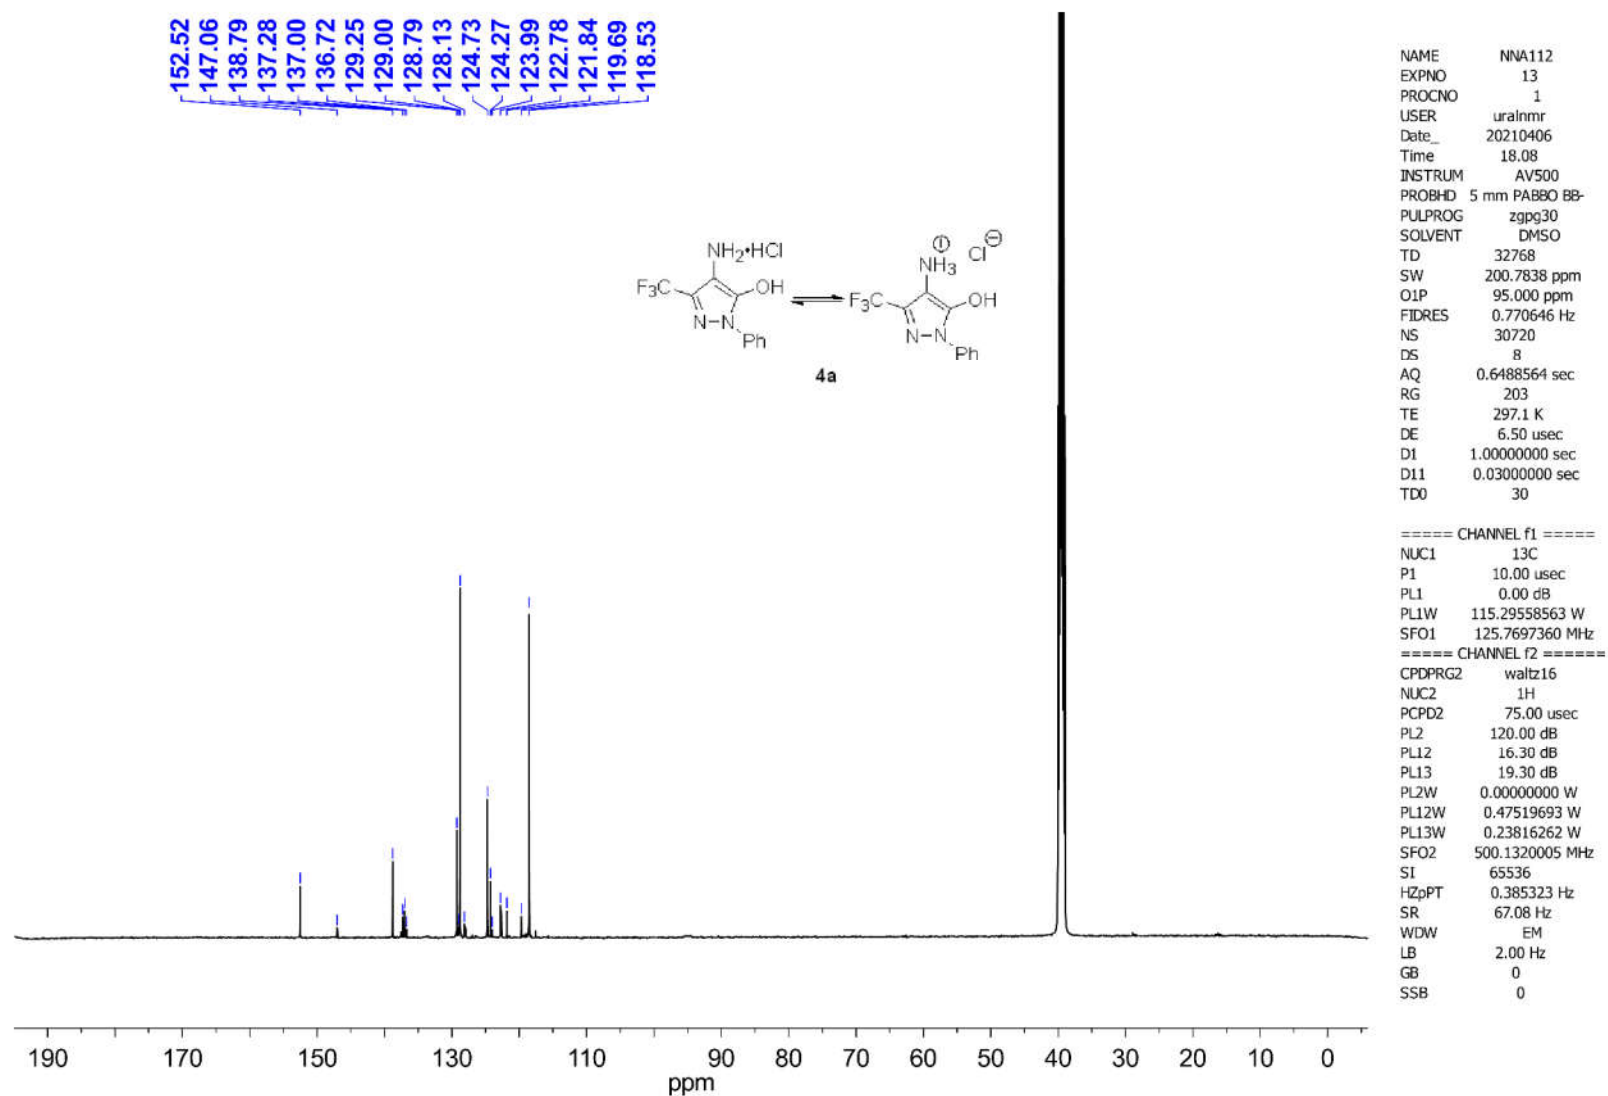

**Figure S11.**  $^{19}\text{F}$  NMR spectrum of 4-amino-3-trifluoromethyl-1-phenyl-1H-pyrazol-5-ol hydrochloride (**4a**).

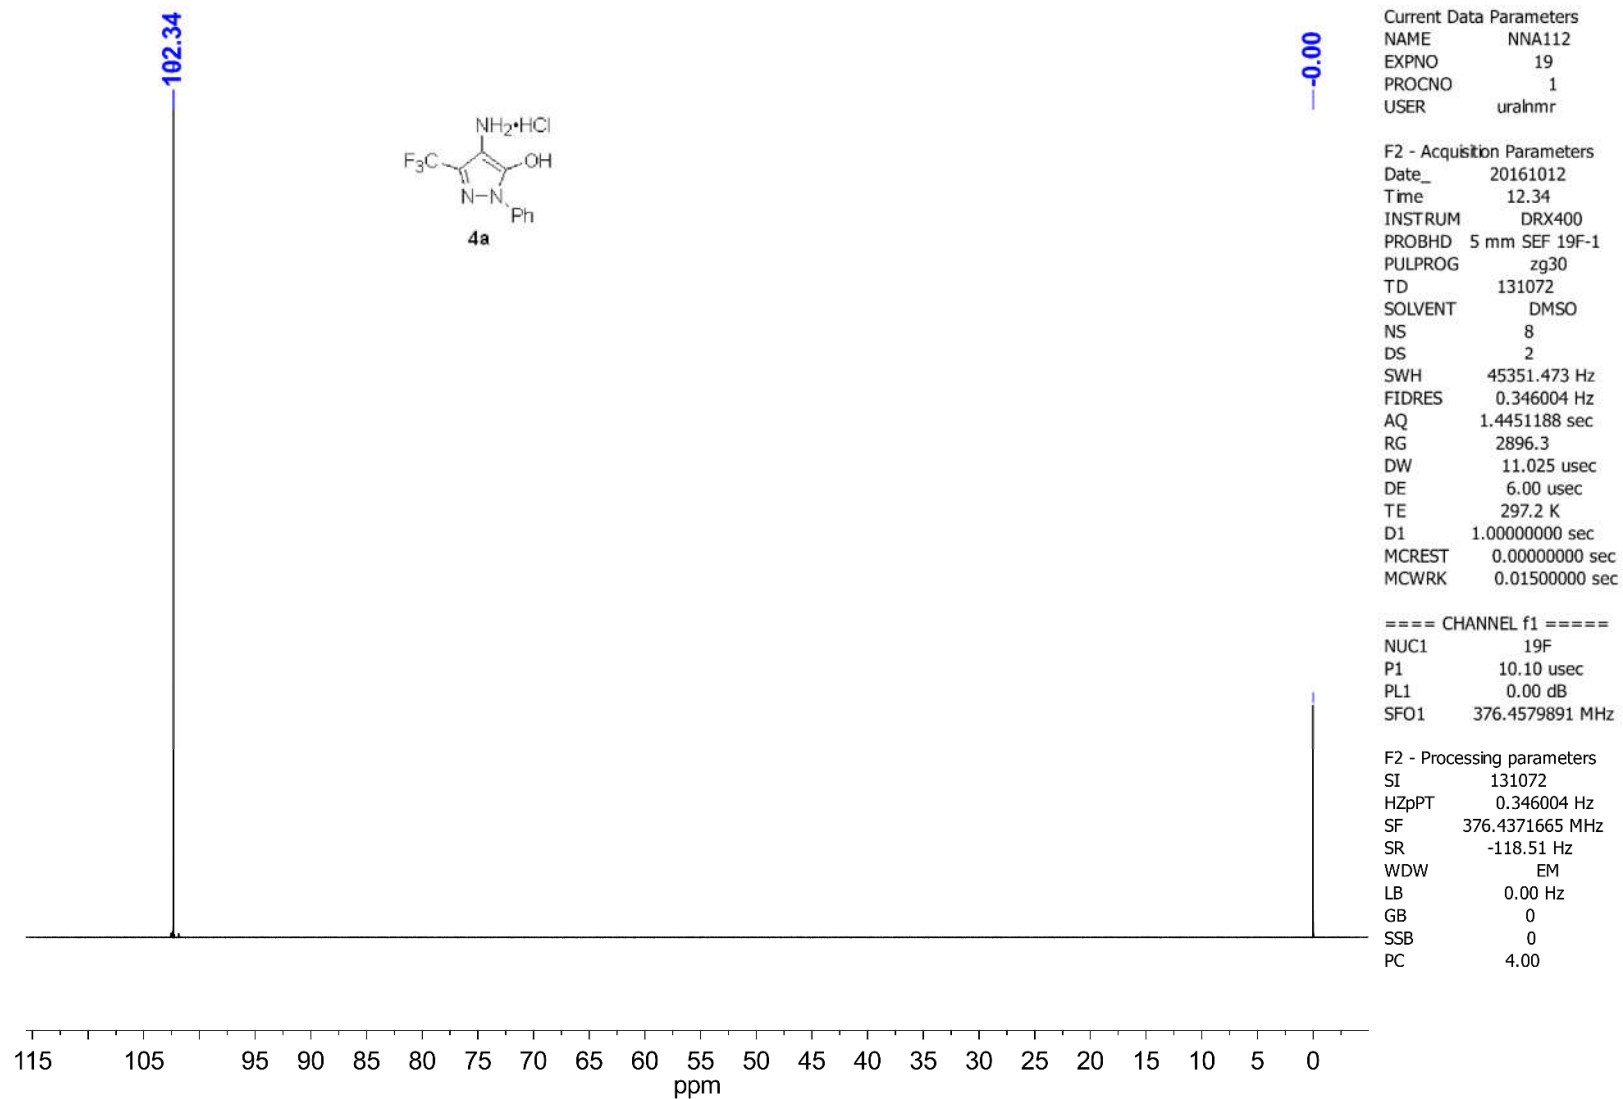

**Figure S12.**  $^1\text{H}$  NMR spectrum of 4-amino-3-pentafluoroethyl-1-phenyl-1H-pyrazol-5-ol hydrate hydrochloride (**4b**).

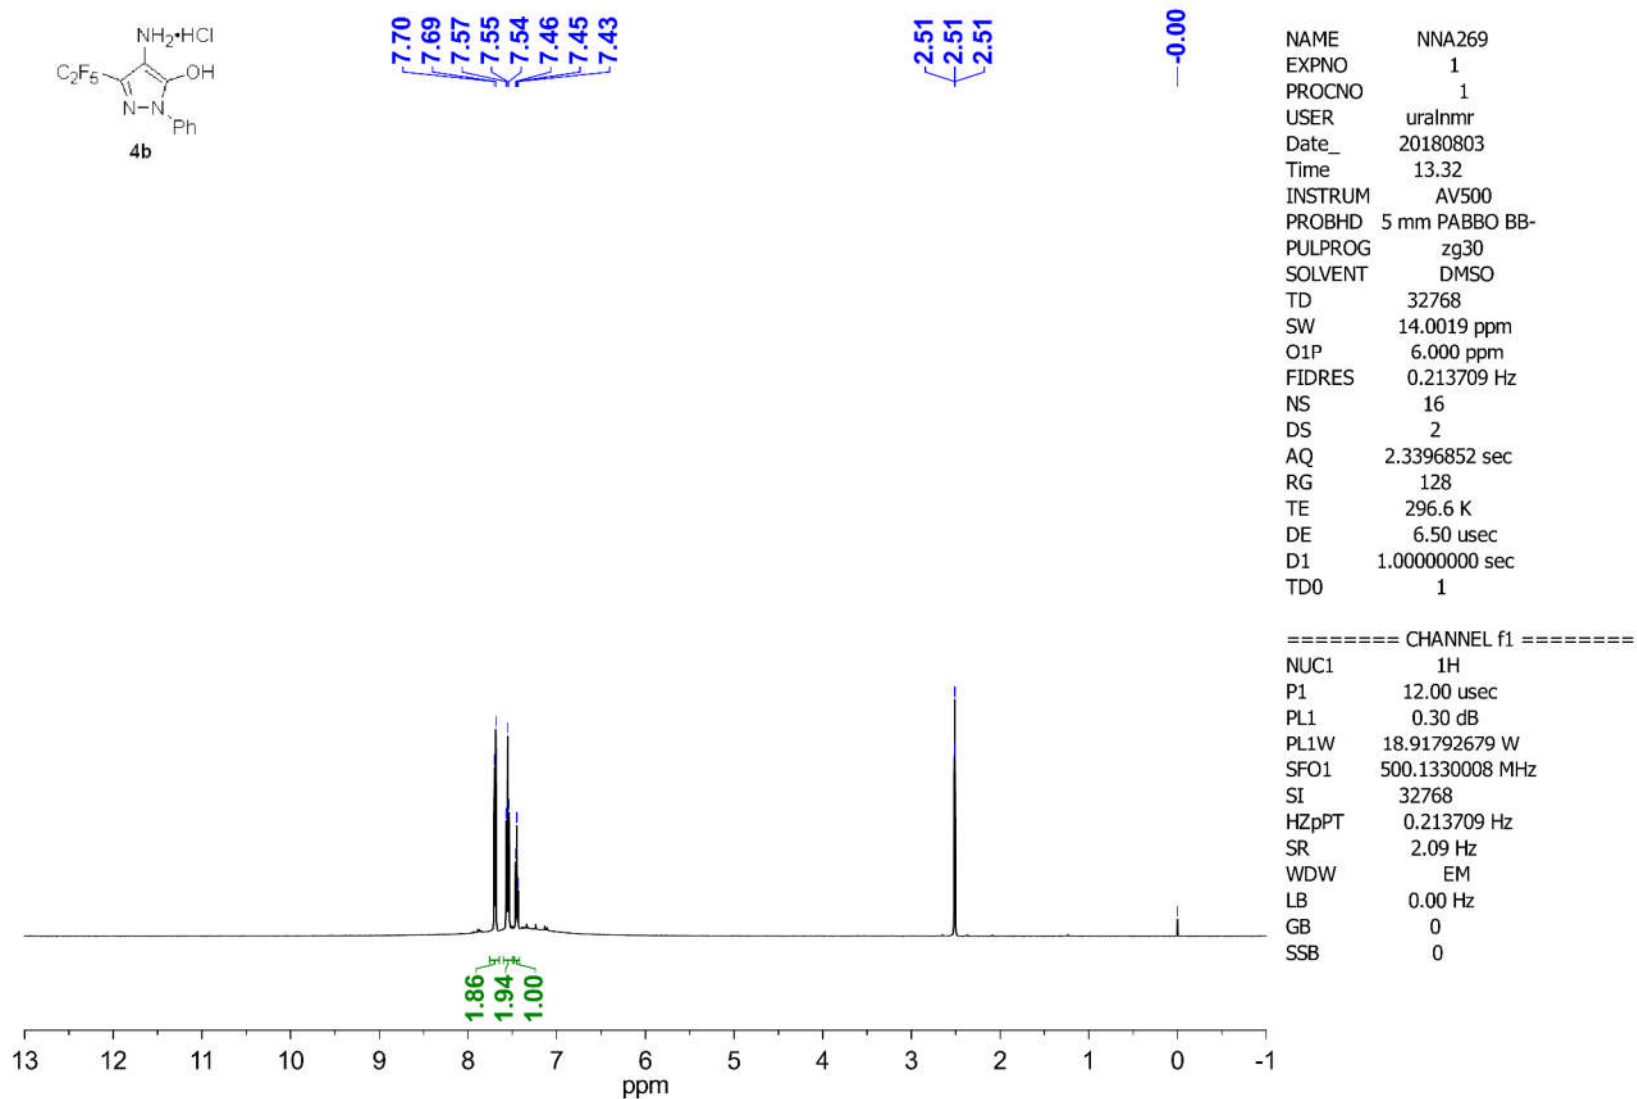

**Figure S13.**  $^1\text{H}$  NMR spectrum of 4-amino-3-pentafluoroethyl-1-phenyl-1H-pyrazol-5-ol hydrate hydrochloride (**4b**) after standing overnight.

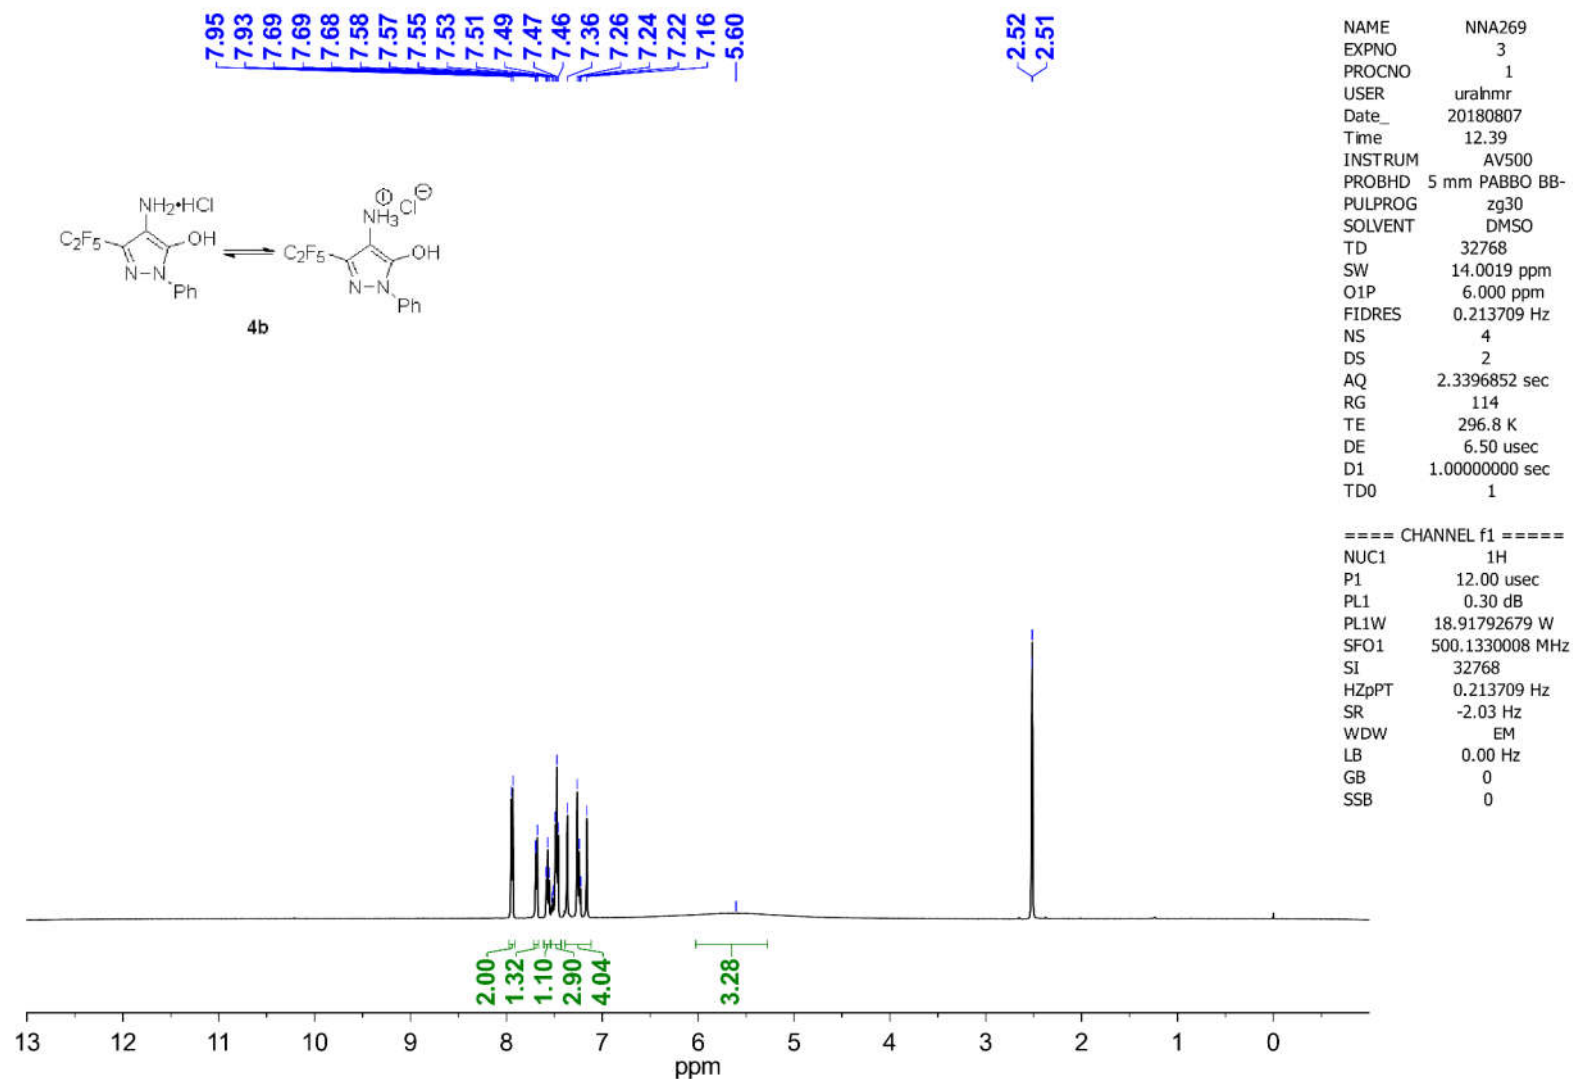

**Figure S14.**  $^{13}\text{C}$  NMR spectrum of 4-amino-3-pentafluoroethyl-1-phenyl-1H-pyrazol-5-ol hydrate hydrochloride (**4b**).

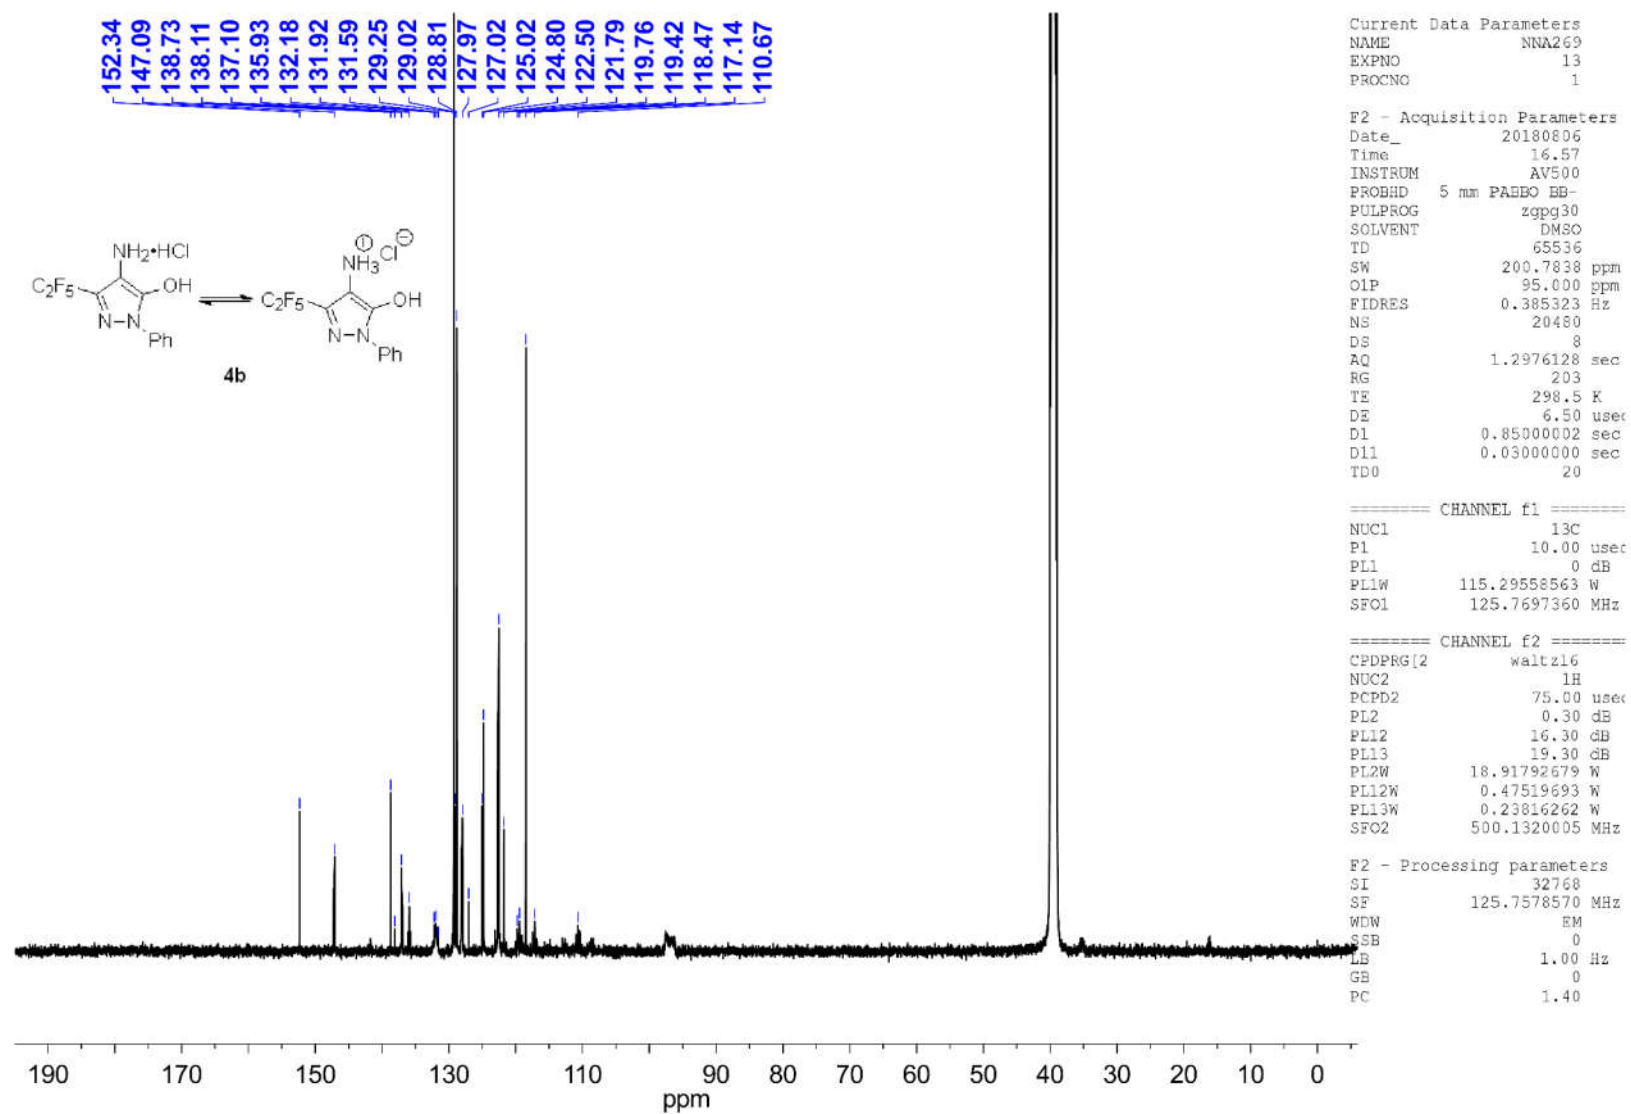

**Figure S15.**  $^{19}\text{F}$  NMR spectrum of 4-amino-3-pentafluoroethyl-1-phenyl-1H-pyrazol-5-ol hydrate hydrochloride (**4b**).

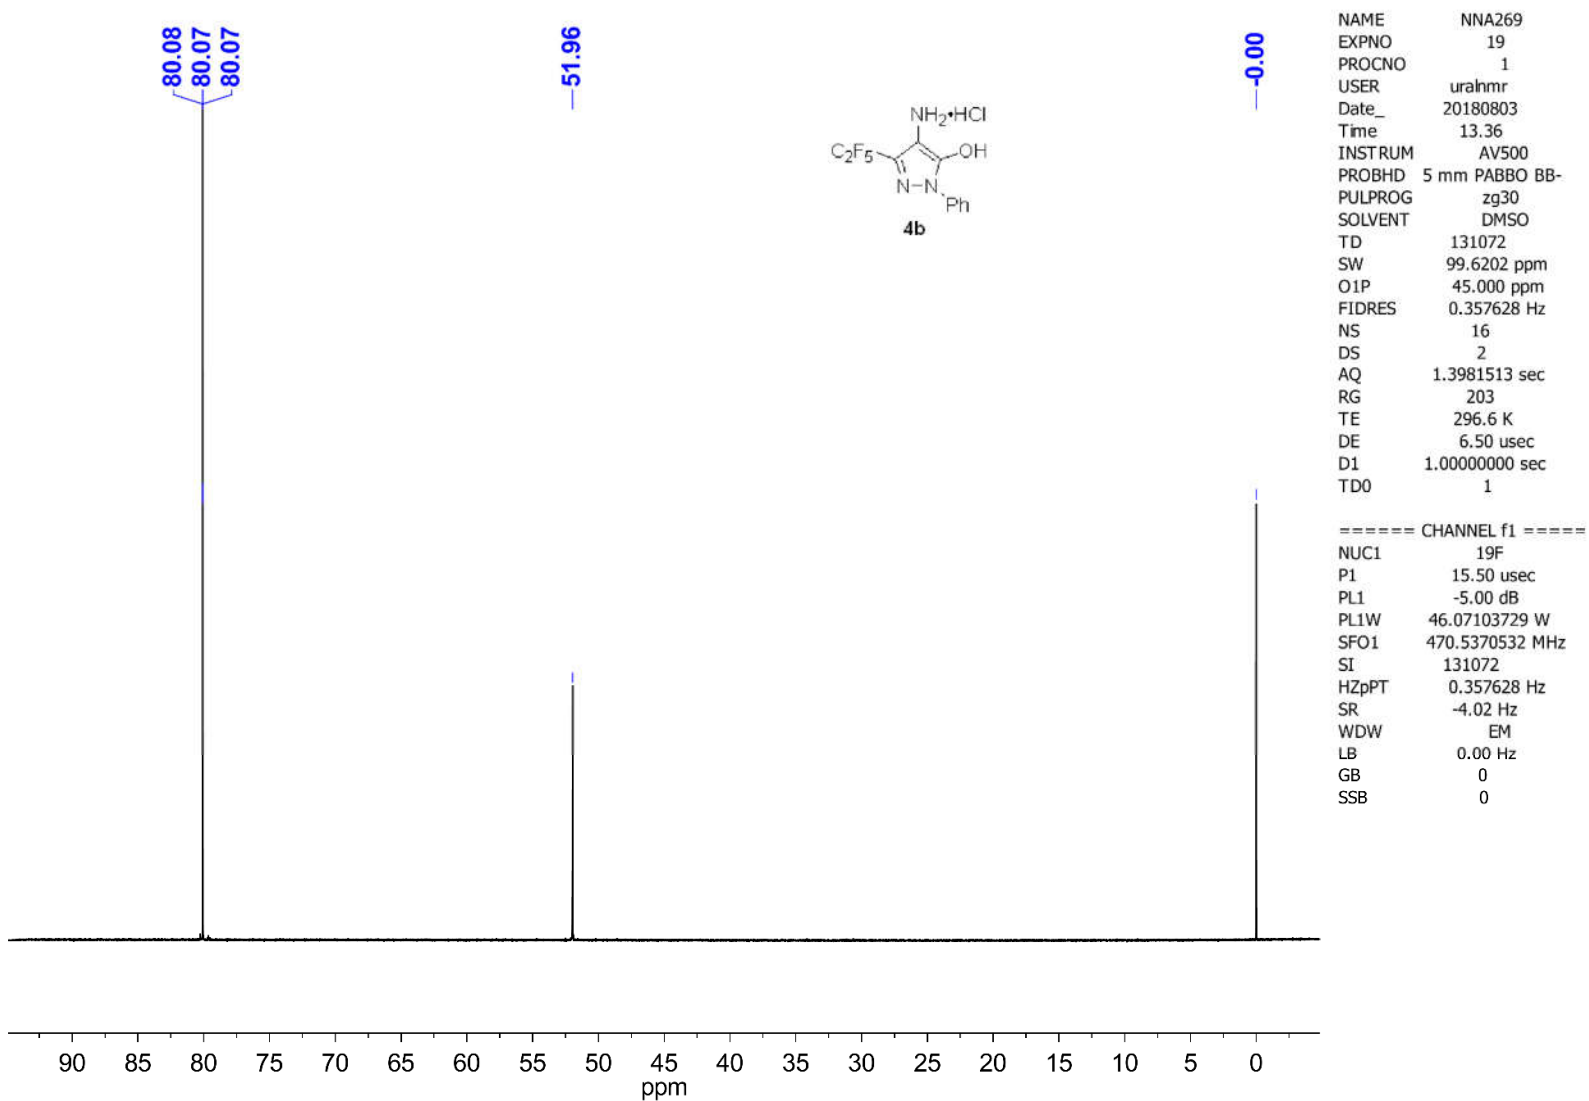

**Figure S16.**  $^1\text{H}$  NMR spectrum of 5-hydroxy-1-phenyl-3-nonafluorobutyl-1H-pyrazol-4-ammonium hydrochloride (**4c**).

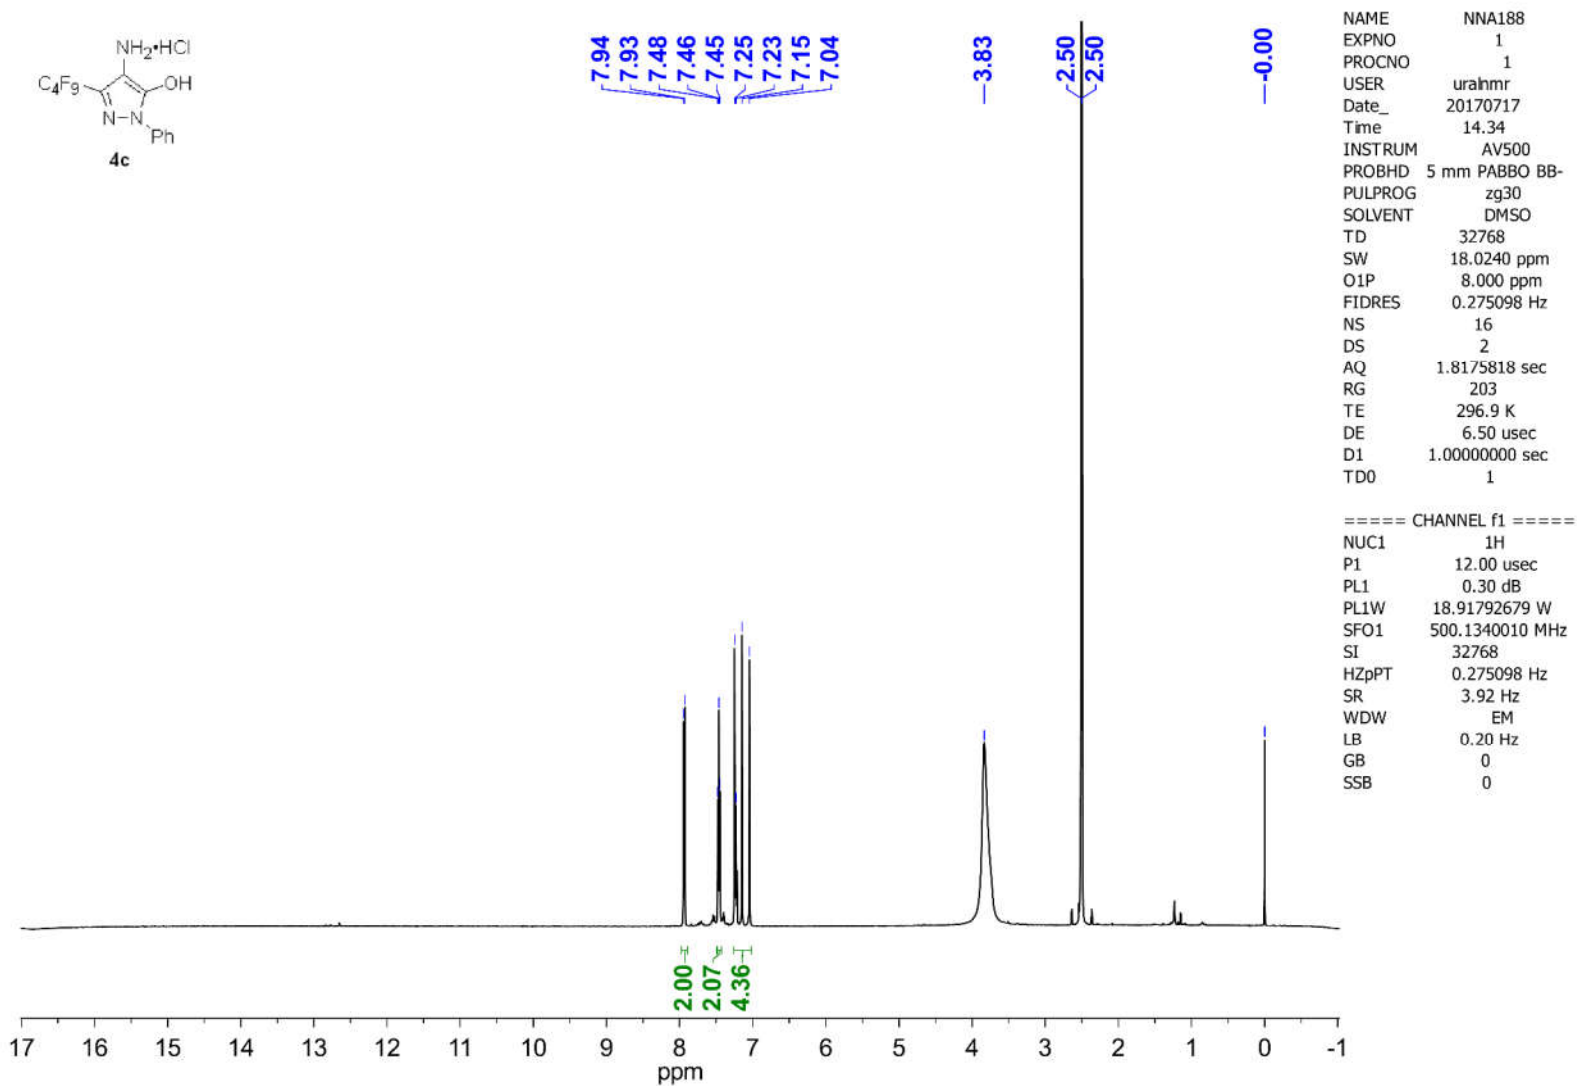

**Figure S17.**  $^{19}\text{F}$  NMR spectrum of 5-hydroxy-1-phenyl-3-nonafluorobutyl-1H-pyrazol-4-ammonium hydrochloride (**4c**).

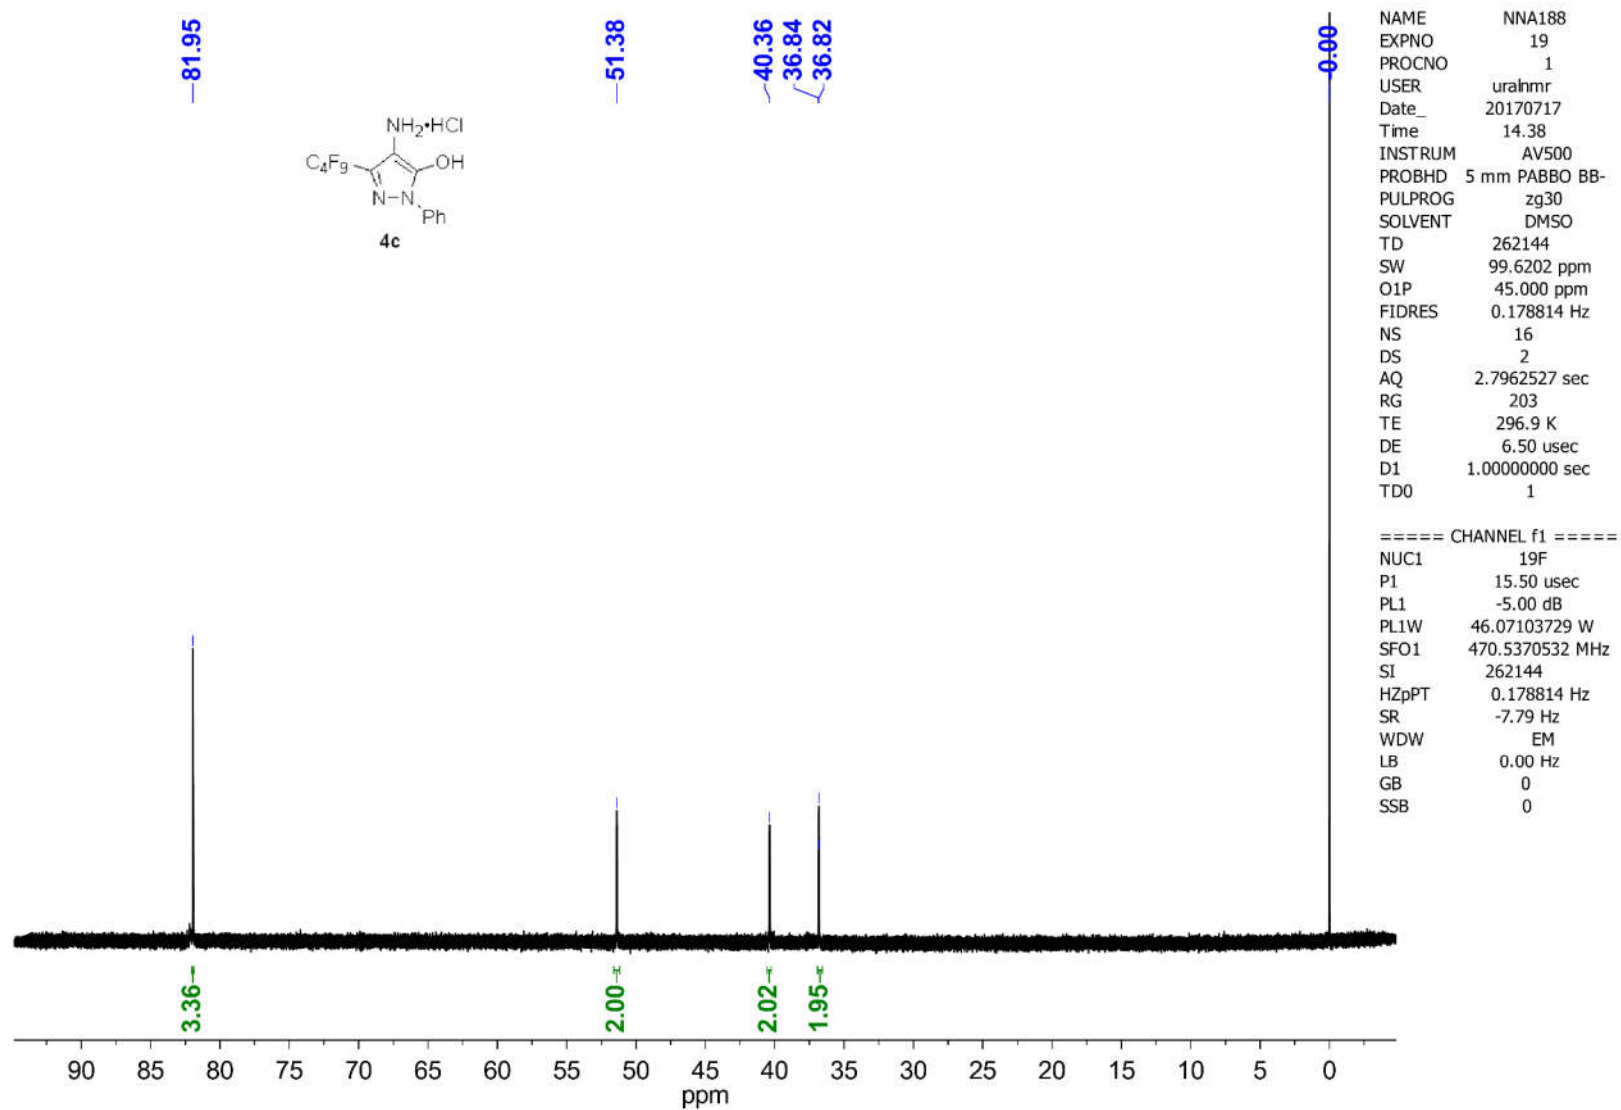

**Figure S18.**  $^1\text{H}$  NMR spectrum of 4-amino-3-methyl-1-phenyl-1H-pyrazol-5-ol hydrochloride hydrate (**4d**).

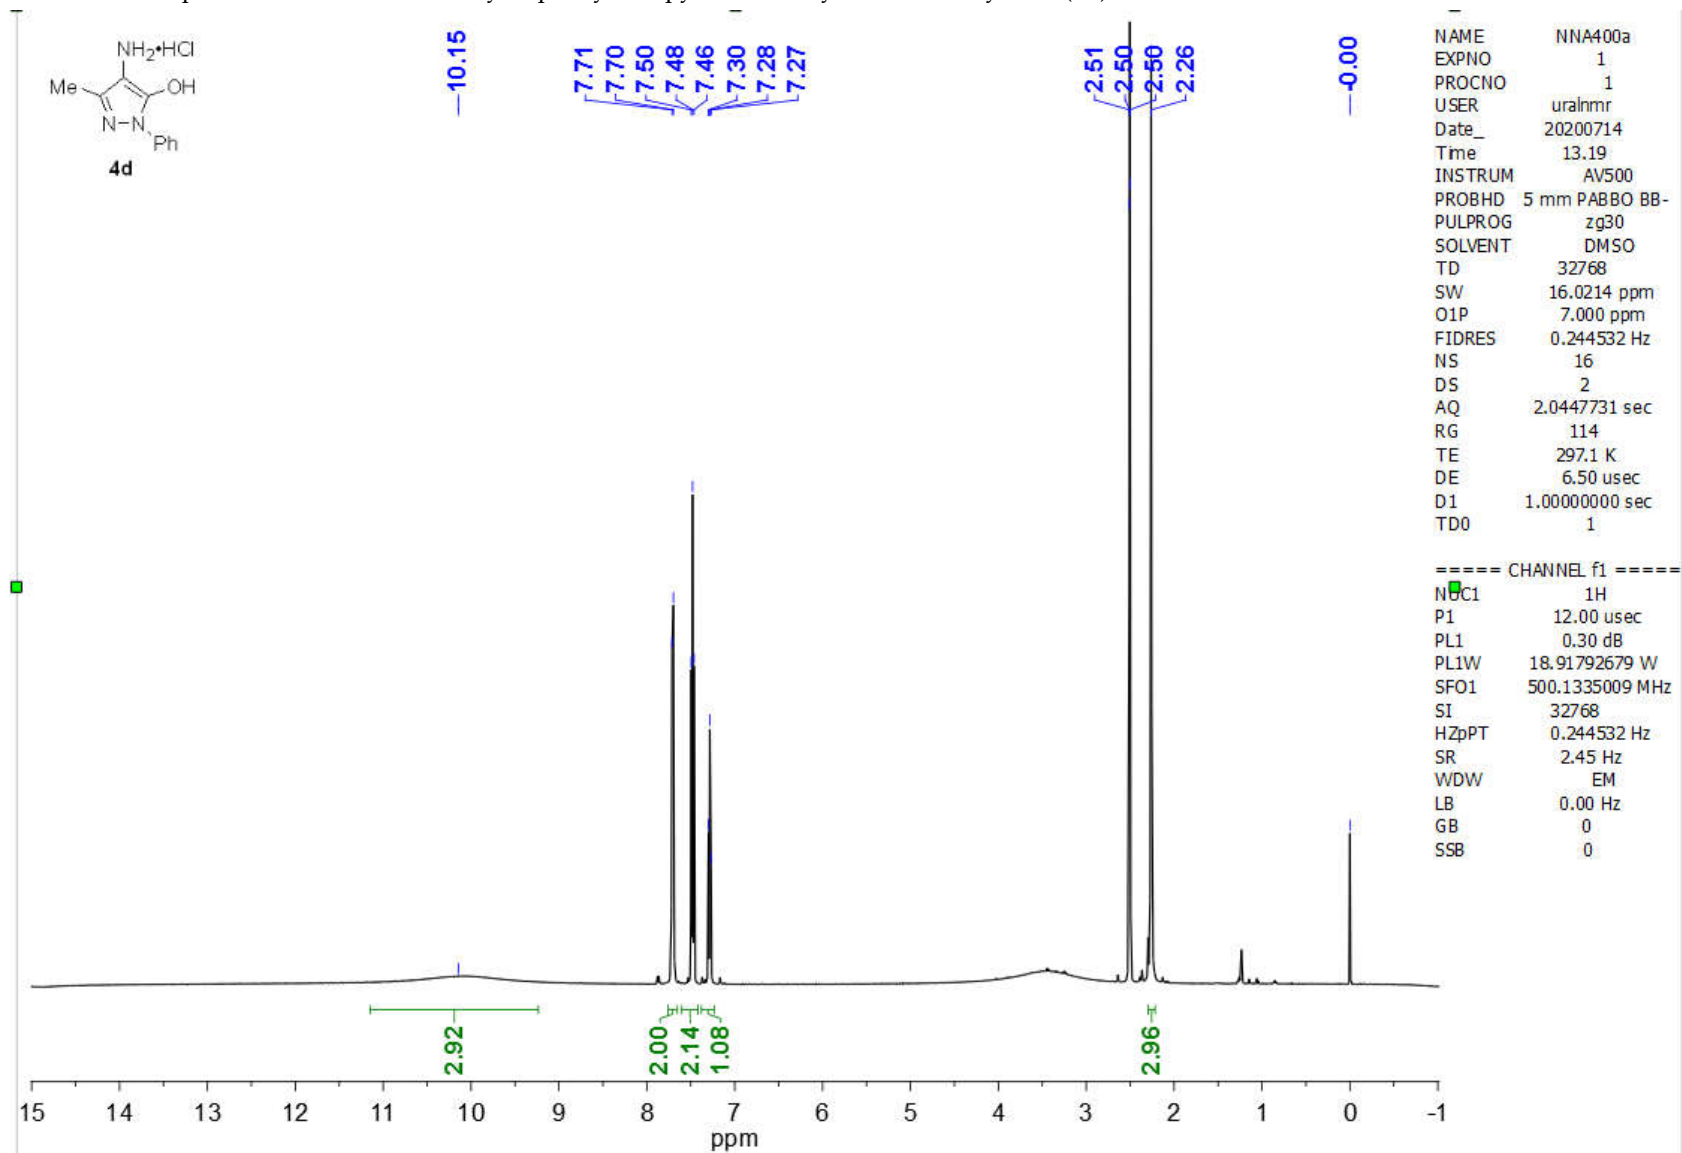

**Figure S19.**  $^{13}\text{C}$  NMR spectrum of 4-amino-3-methyl-1-phenyl-1H-pyrazol-5-ol hydrochloride hydrate (**4d**).

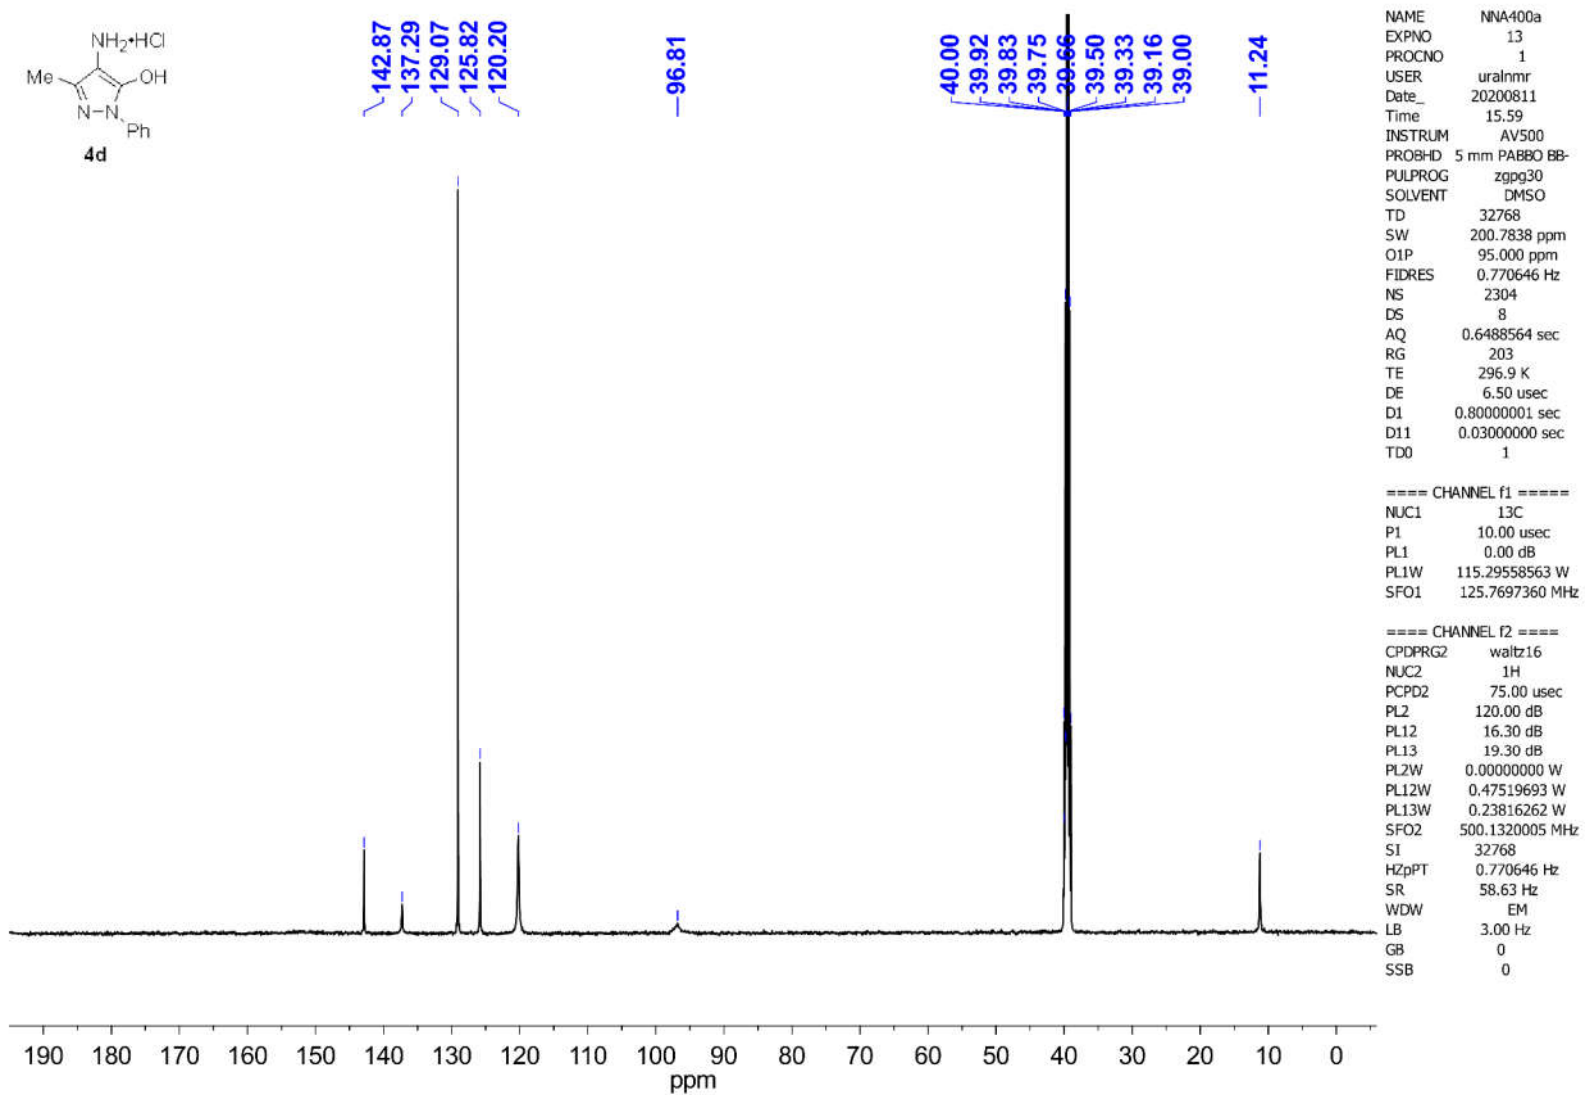

**Figure S20.**  $^1\text{H}$  NMR spectrum of 4-amino-3-trifluoromethyl-1H-pyrazol-5-ol hydrochloride (**4e**).

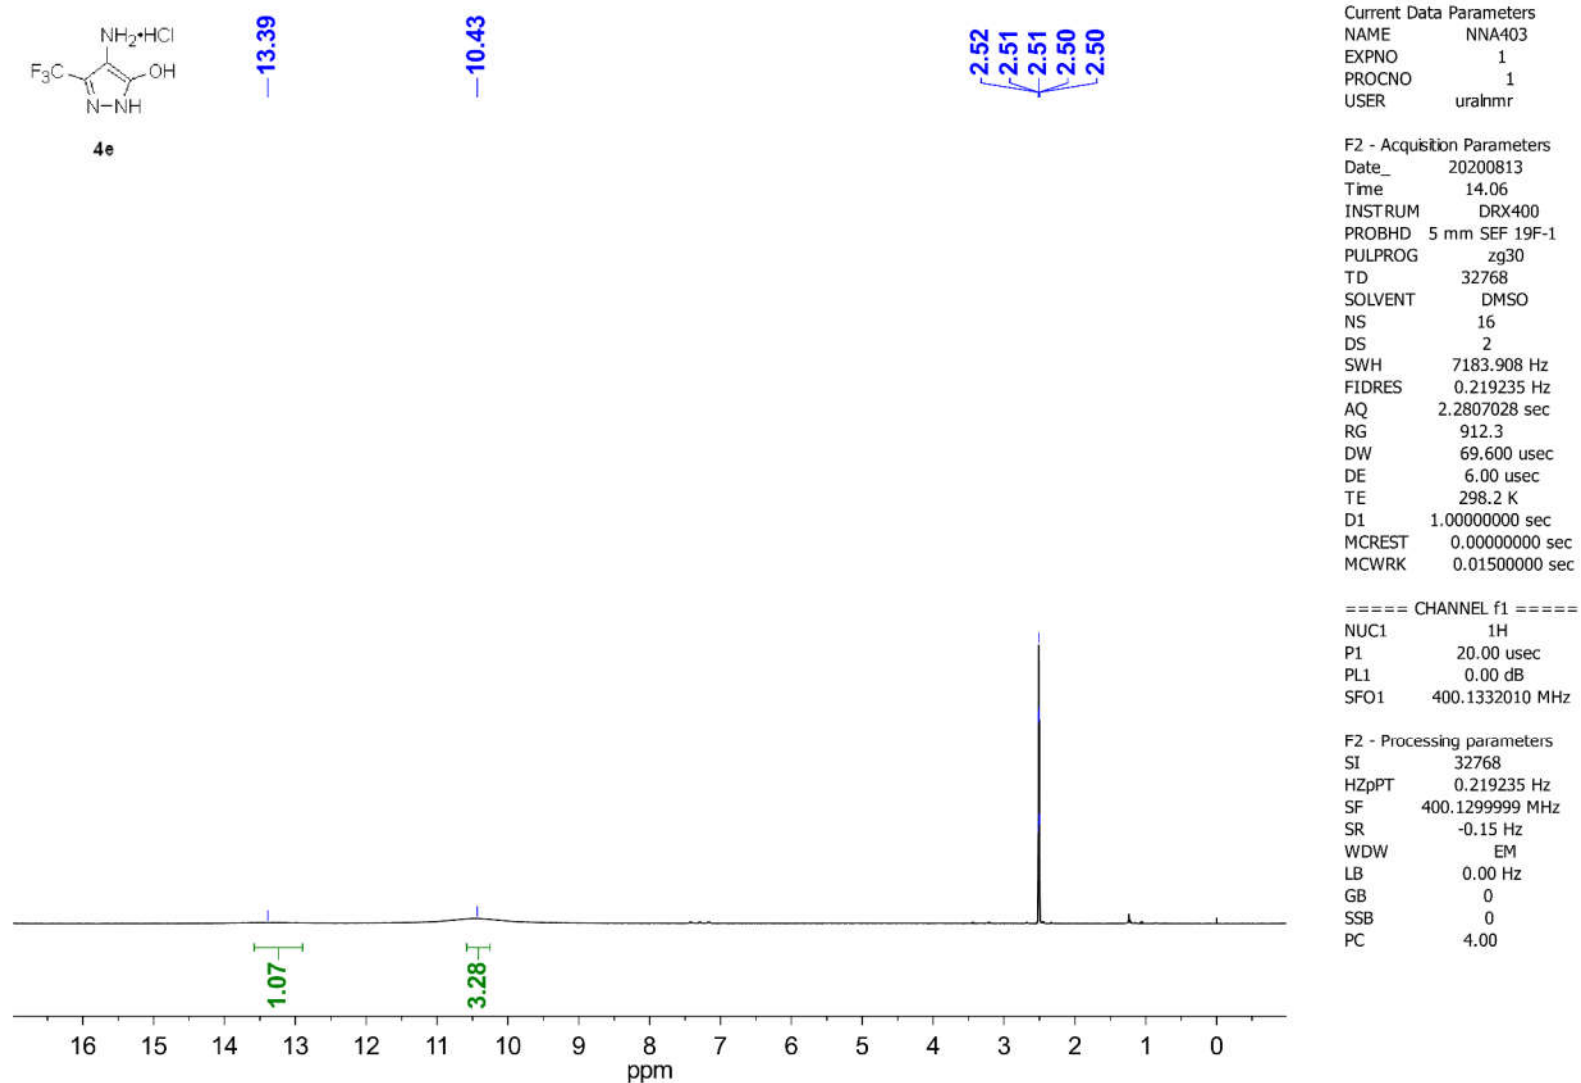

**Figure S21.**  $^{13}\text{C}$  NMR spectrum of 4-amino-3-trifluoromethyl-1H-pyrazol-5-ol hydrochloride (**4e**).

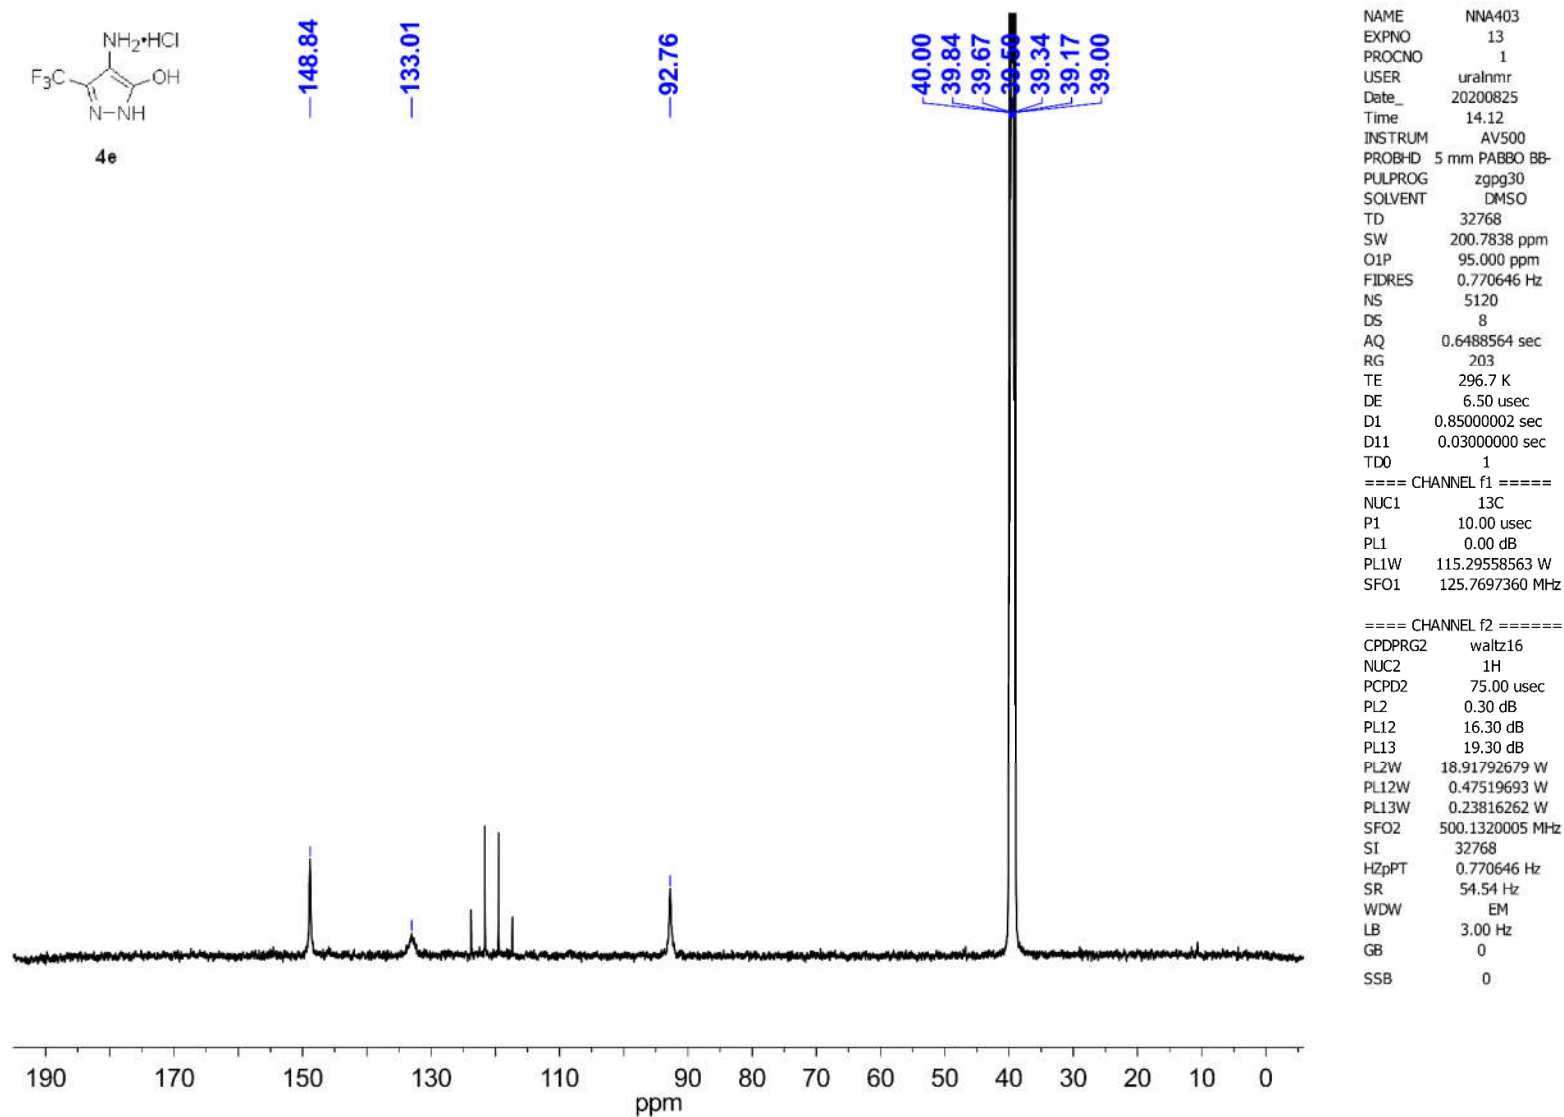

**Figure S22.**  $^{19}\text{F}$  NMR spectrum of 4-amino-3-trifluoromethyl-1H-pyrazol-5-ol hydrochloride (**4e**).

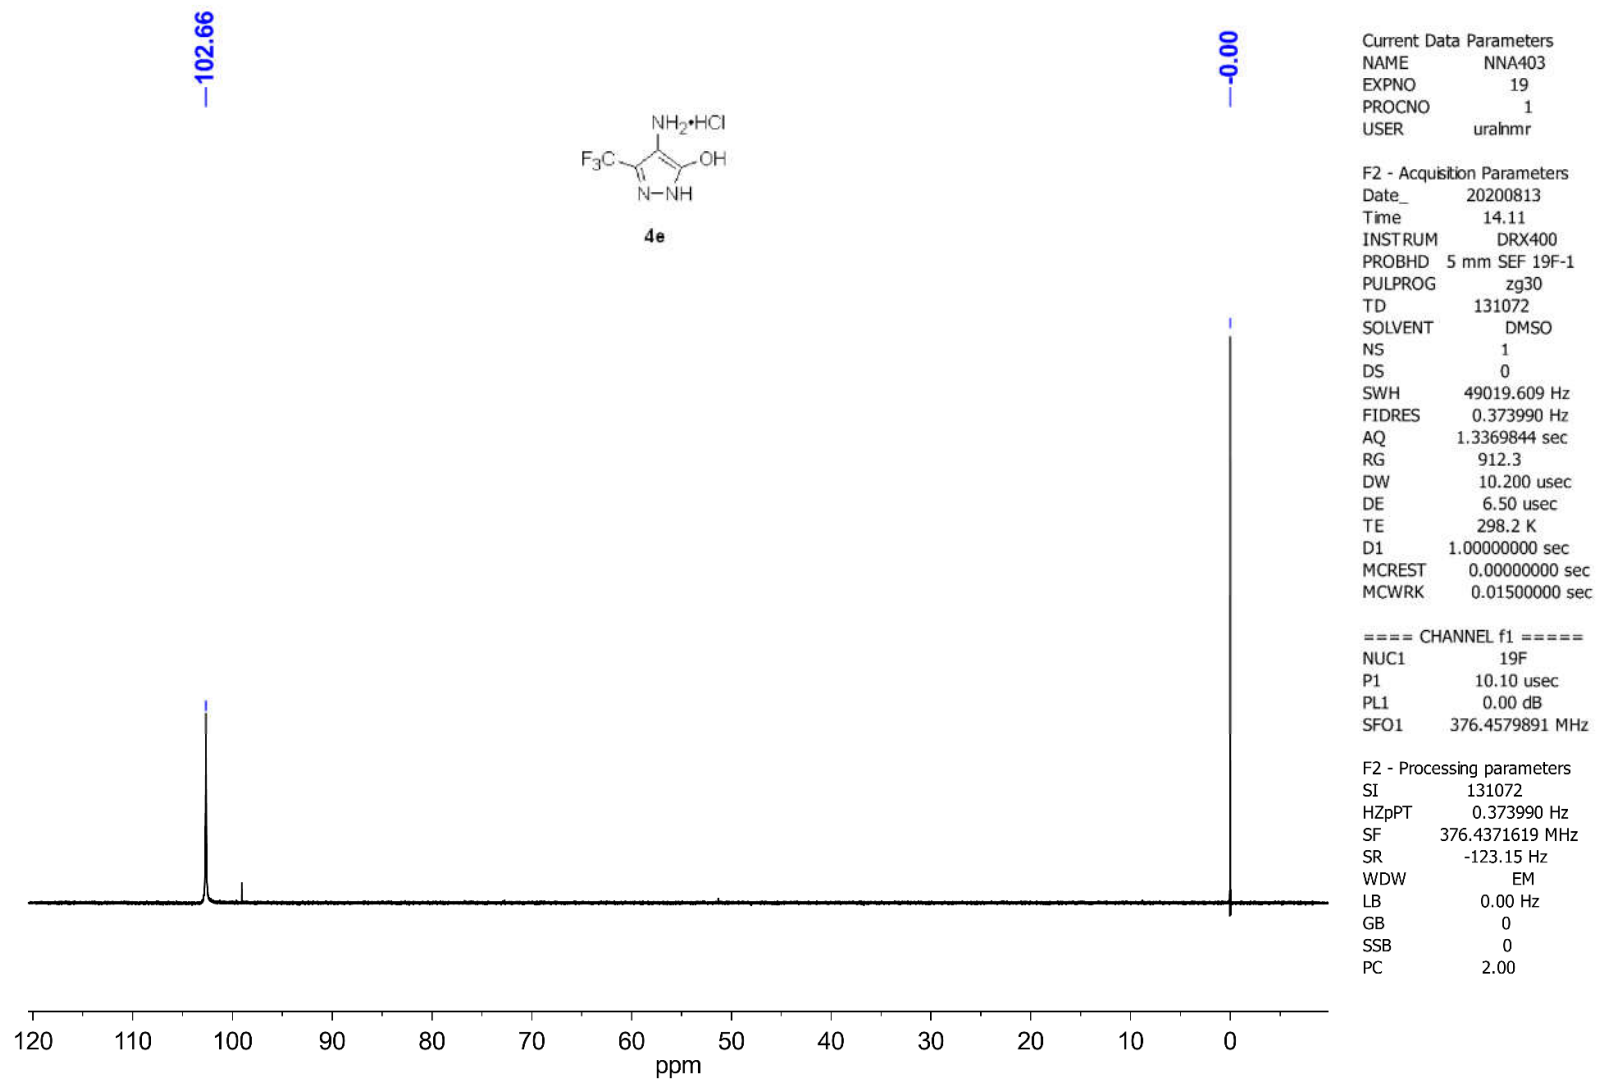

**Figure S23.**  $^1\text{H}$  NMR spectrum of 4-amino-3-(1,1,2,2-tetrafluoroethyl)-1H-pyrazol-5-ol hydrate hydrochloride (**4f**).

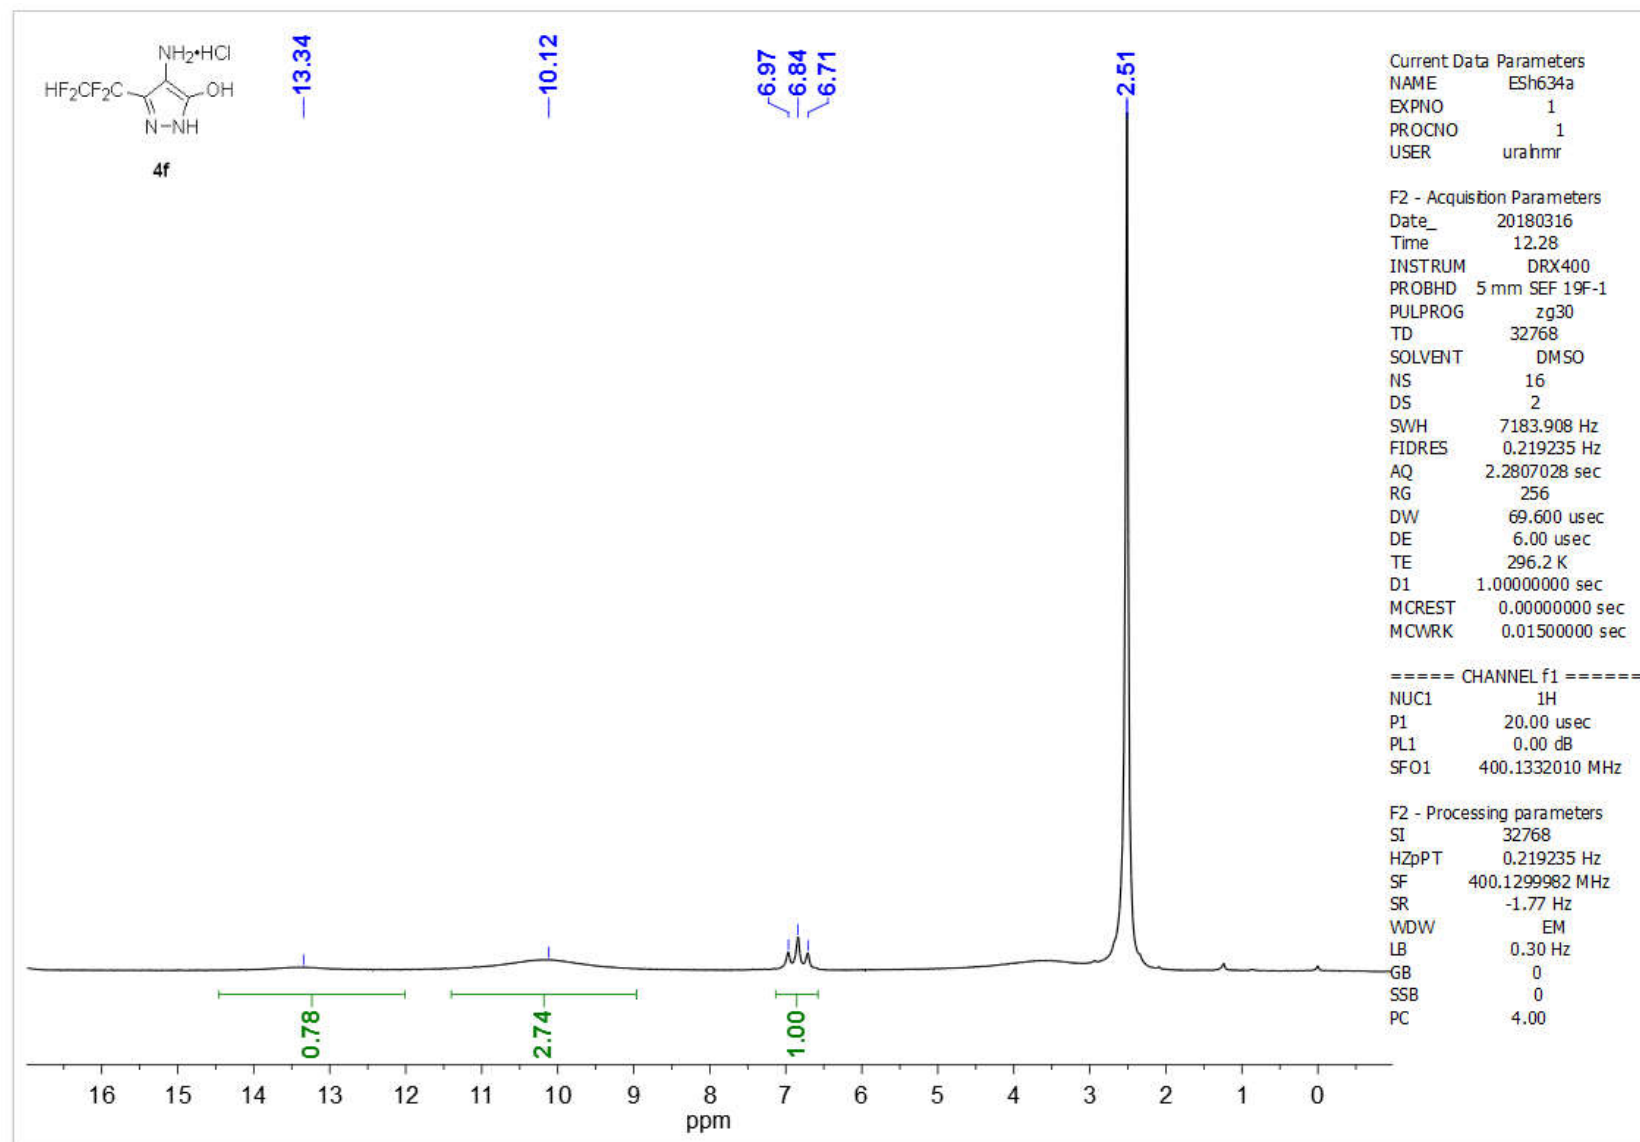

**Figure S24.**  $^{19}\text{F}$  NMR spectrum of 4-amino-3-(1,1,2,2-tetrafluoroethyl)-1H-pyrazol-5-ol hydrate hydrochloride (**4f**).

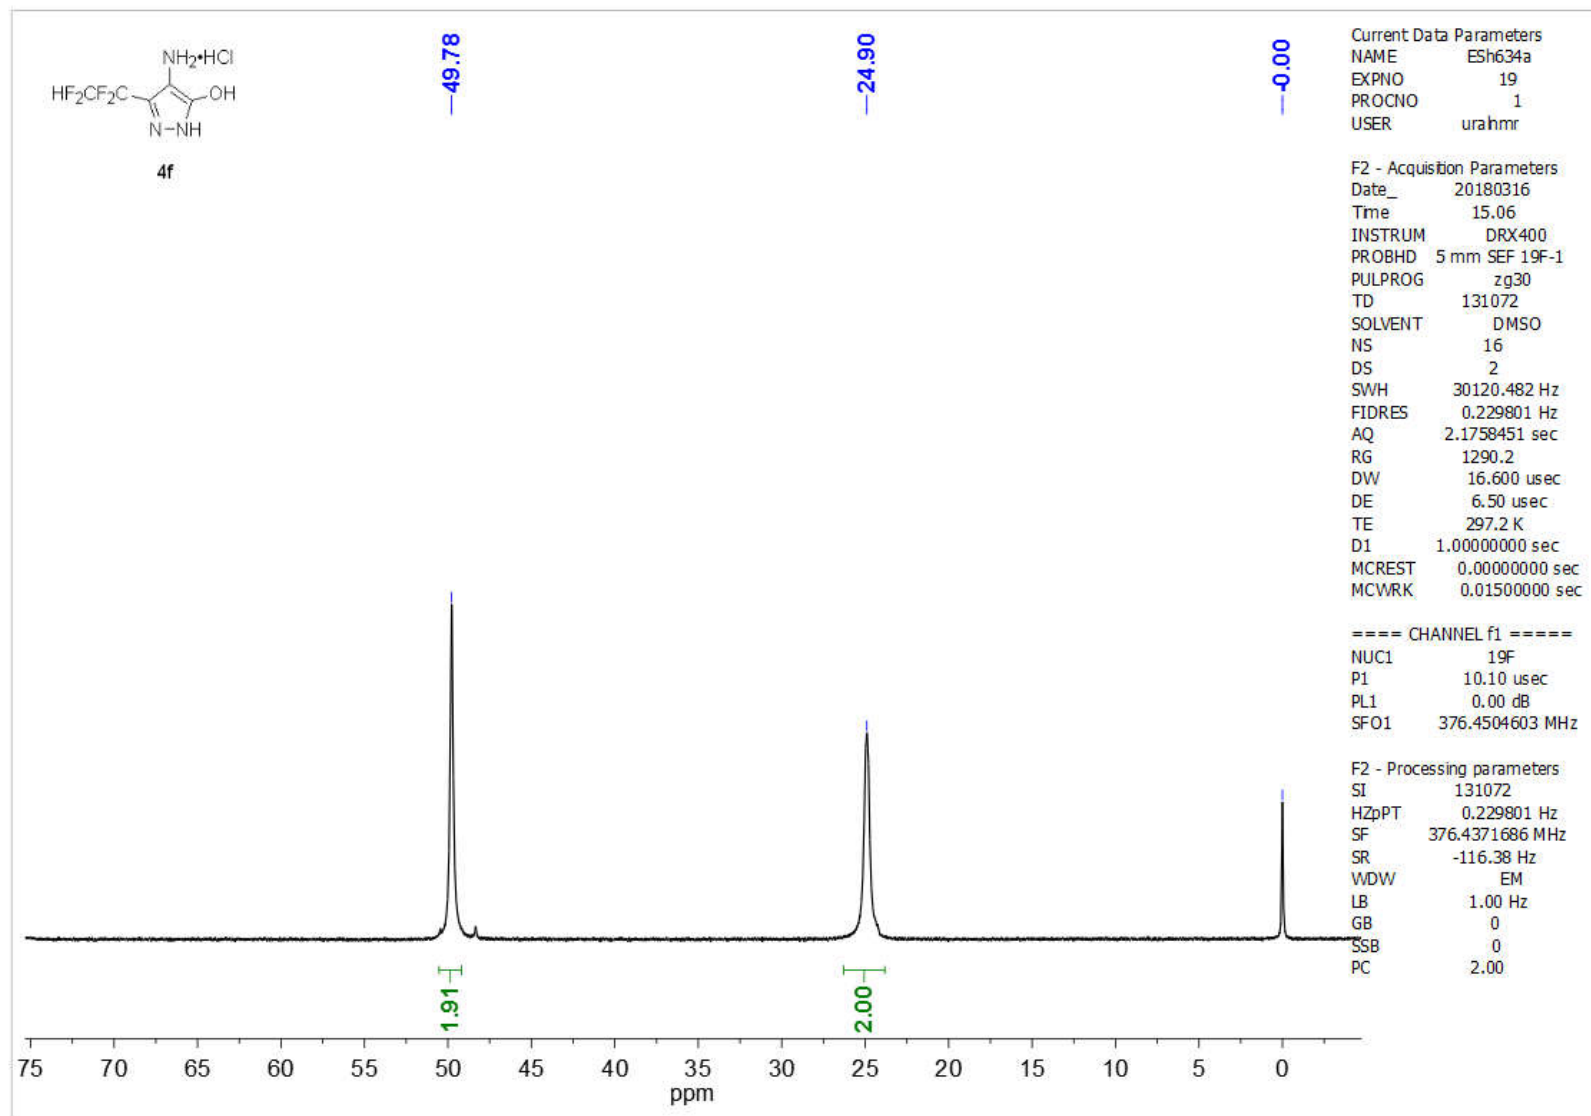

**Figure S25.**  $^1\text{H}$  NMR spectrum of 4-amino-3-(pentafluoroethyl)-1H-pyrazol-5-ol hydrate hydrochloride (**4g**).

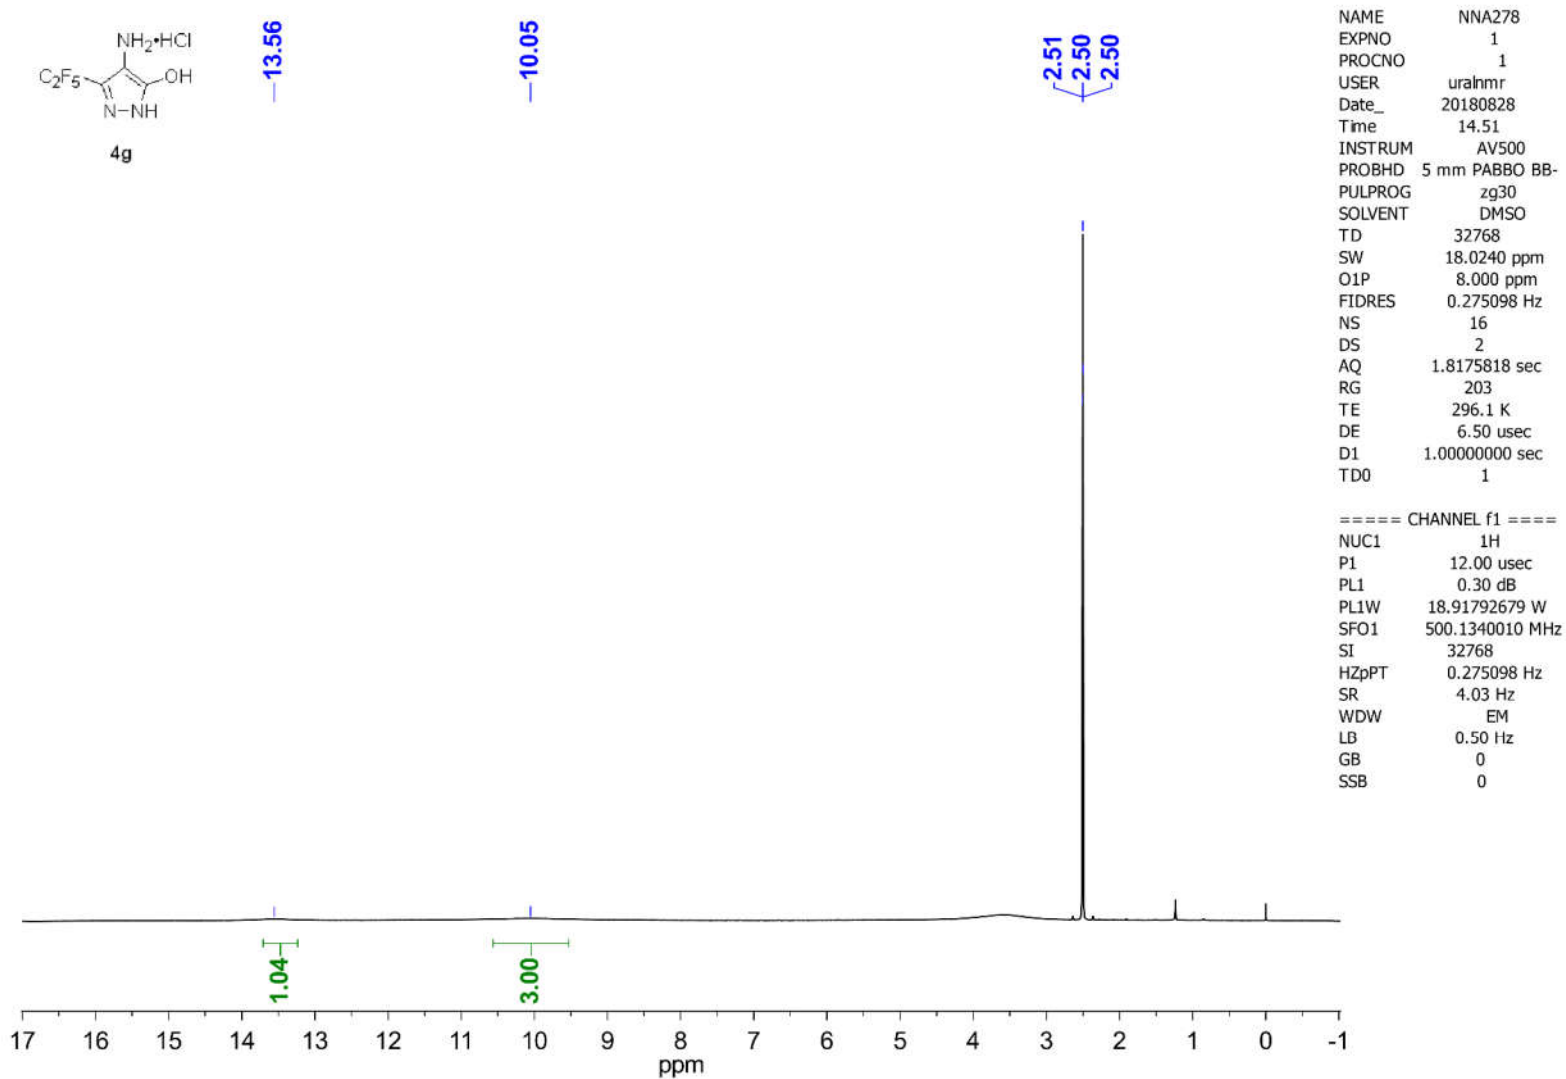

**Figure S26.**  $^{19}\text{F}$  NMR spectrum of 4-amino-3-(pentafluoroethyl)-1H-pyrazol-5-ol hydrate hydrochloride (**4g**).

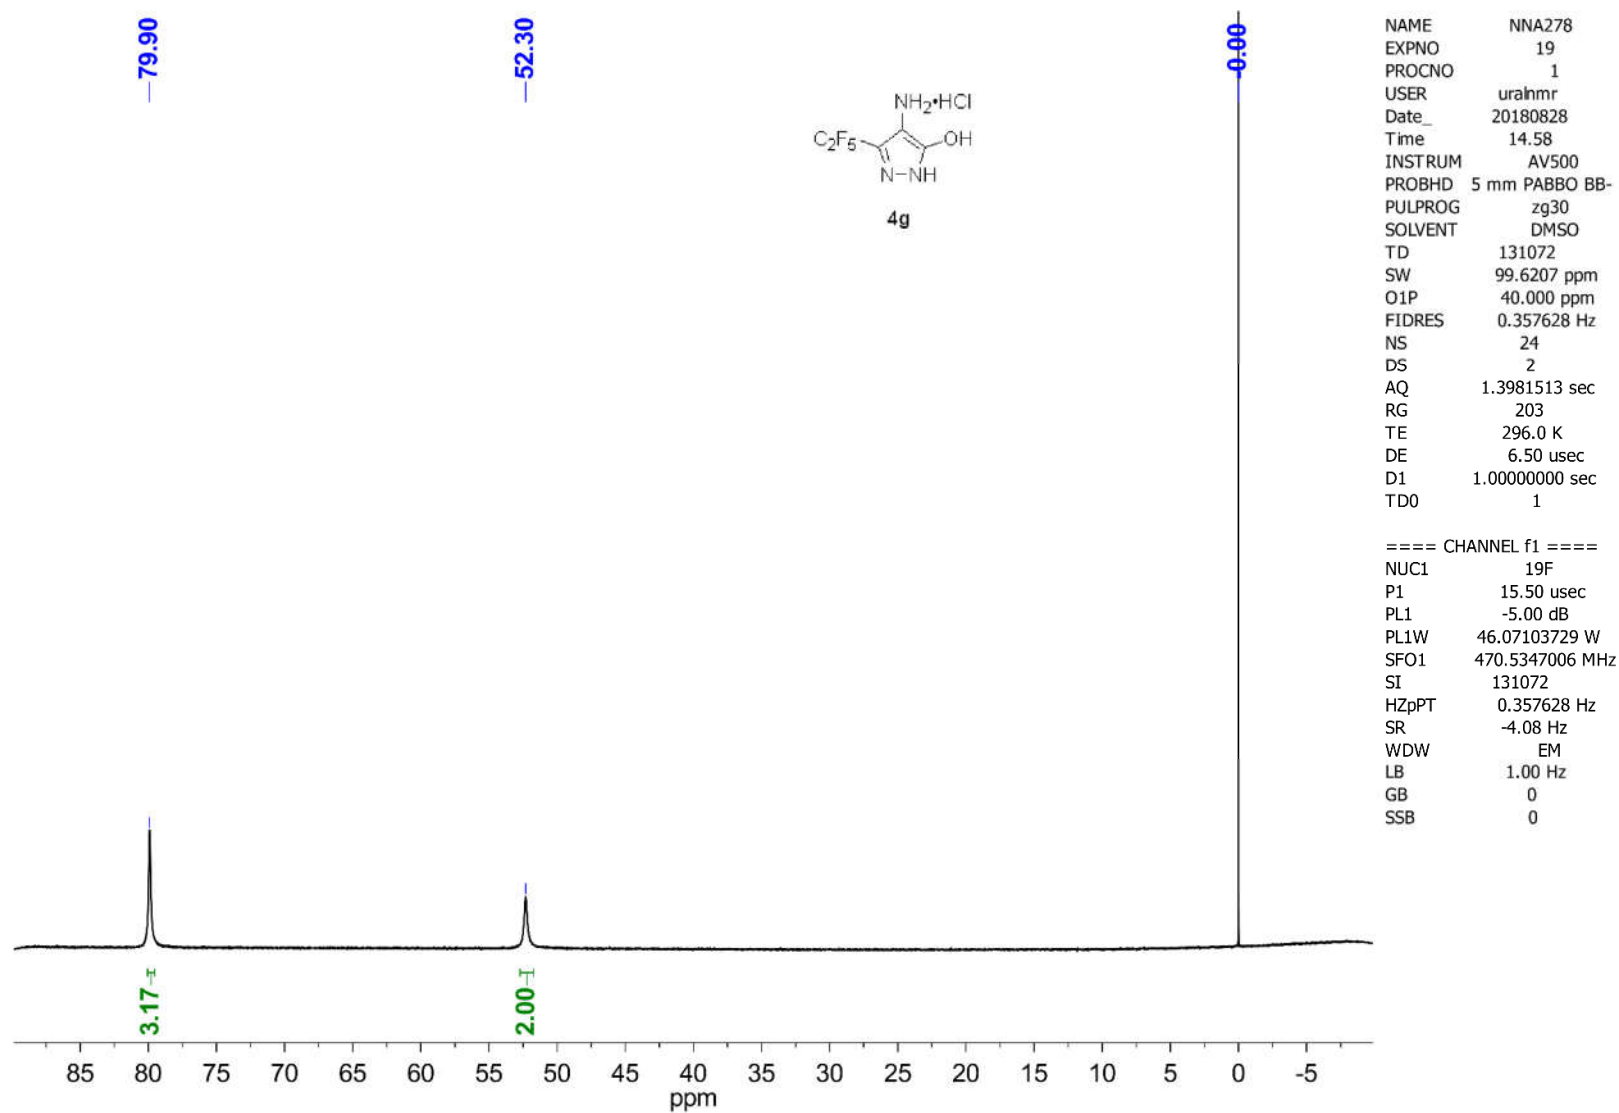

**Figure S27.**  $^1\text{H}$  NMR spectrum of 4-amino-3-(heptafluoropropyl)-1H-pyrazol-5-ol hydrate hydrochloride (**4h**).

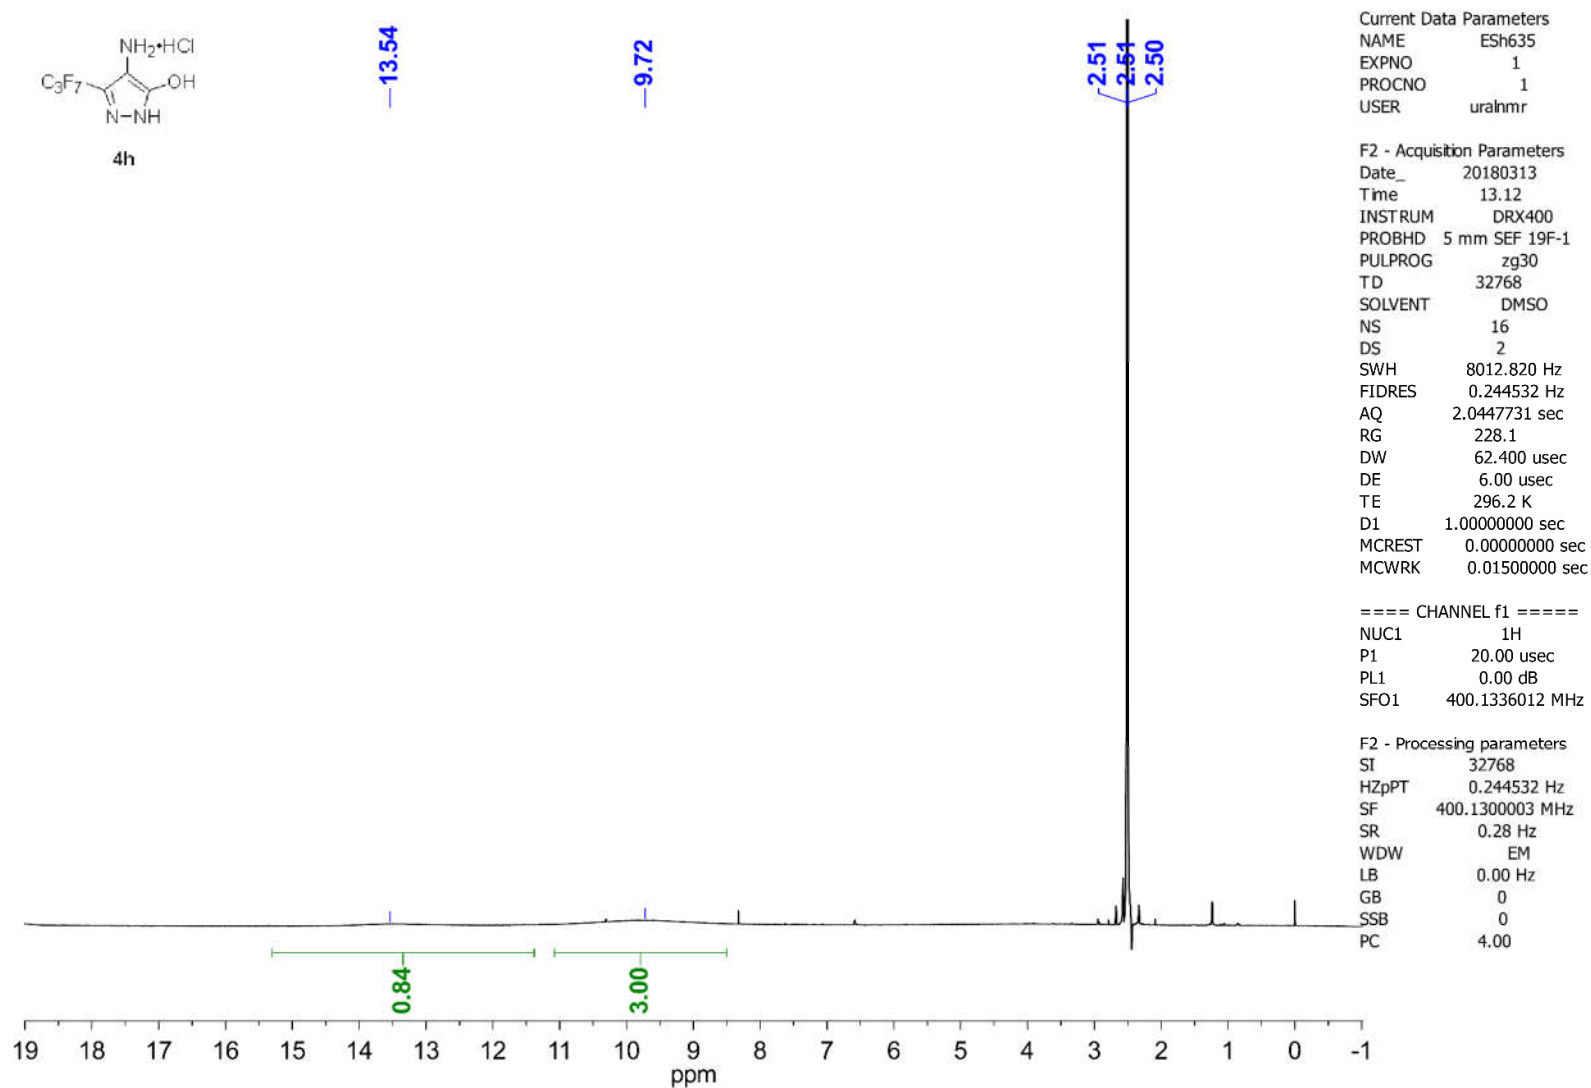

**Figure S28.**  $^{19}\text{F}$  NMR spectrum of 4-amino-3-(heptafluoropropyl)-1H-pyrazol-5-ol hydrate hydrochloride (**4h**).

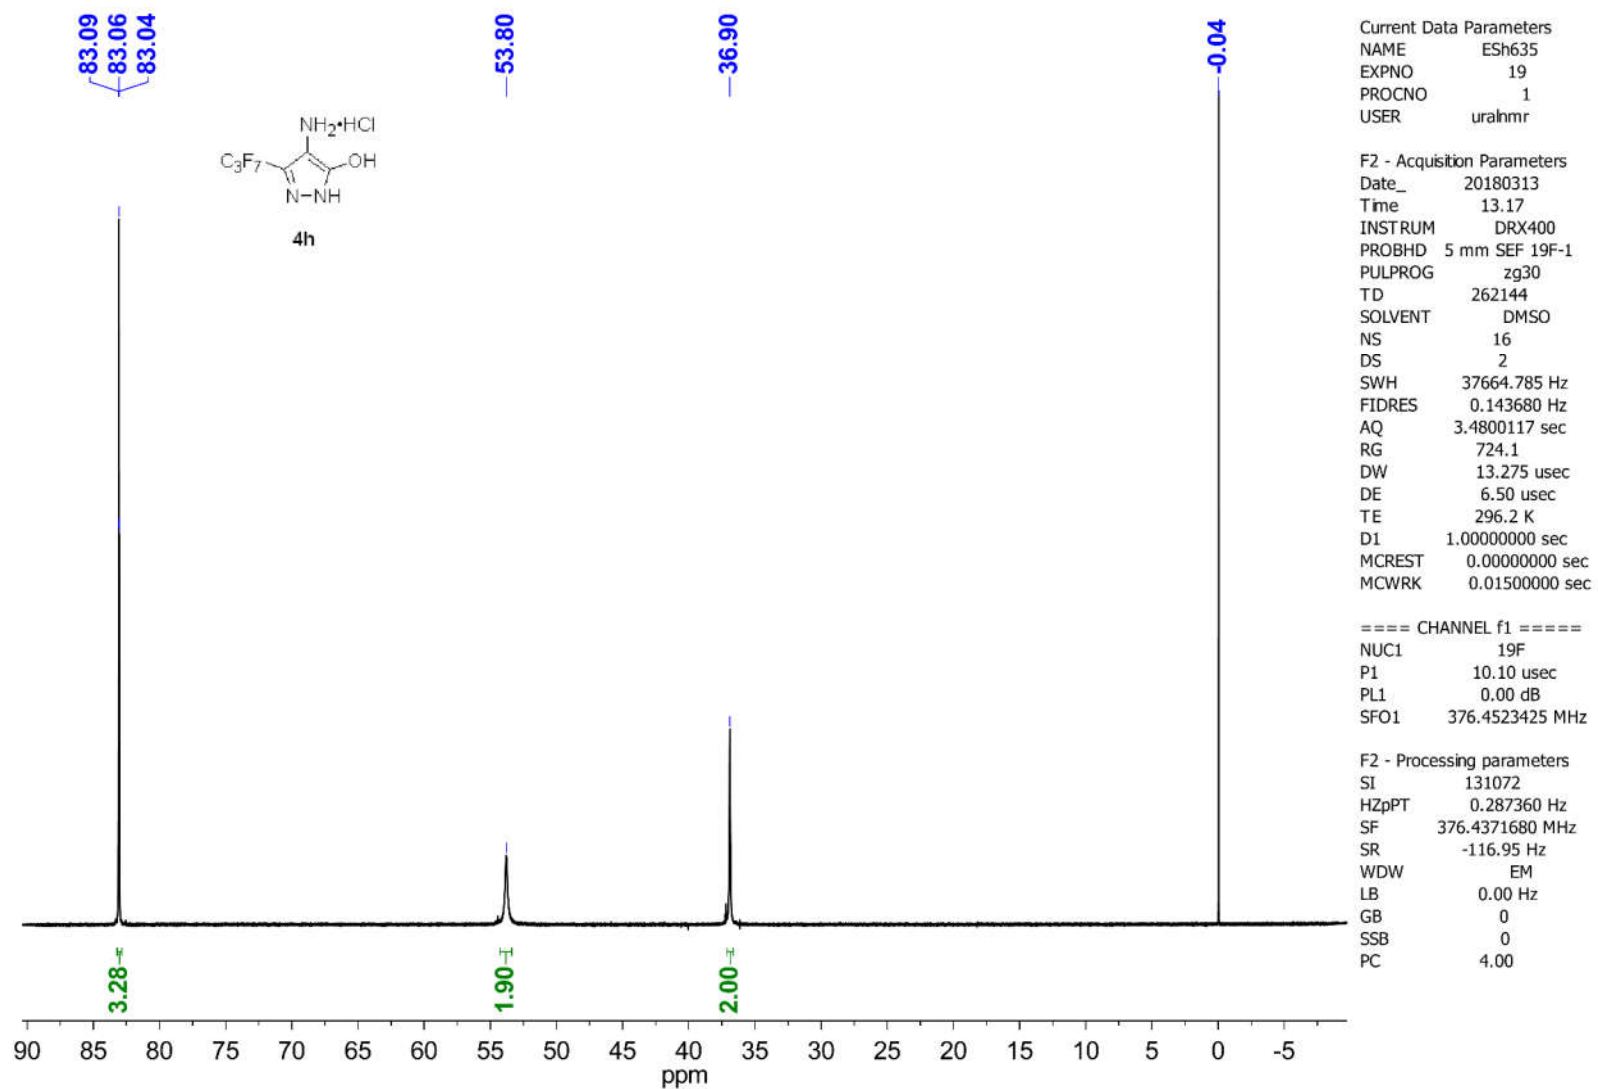

**Figure S29.**  $^1\text{H}$  NMR spectrum of 4-amino-3-(nonafluorobutyl)-1H-pyrazol-5-ol hydrate hydrochloride (**4i**).

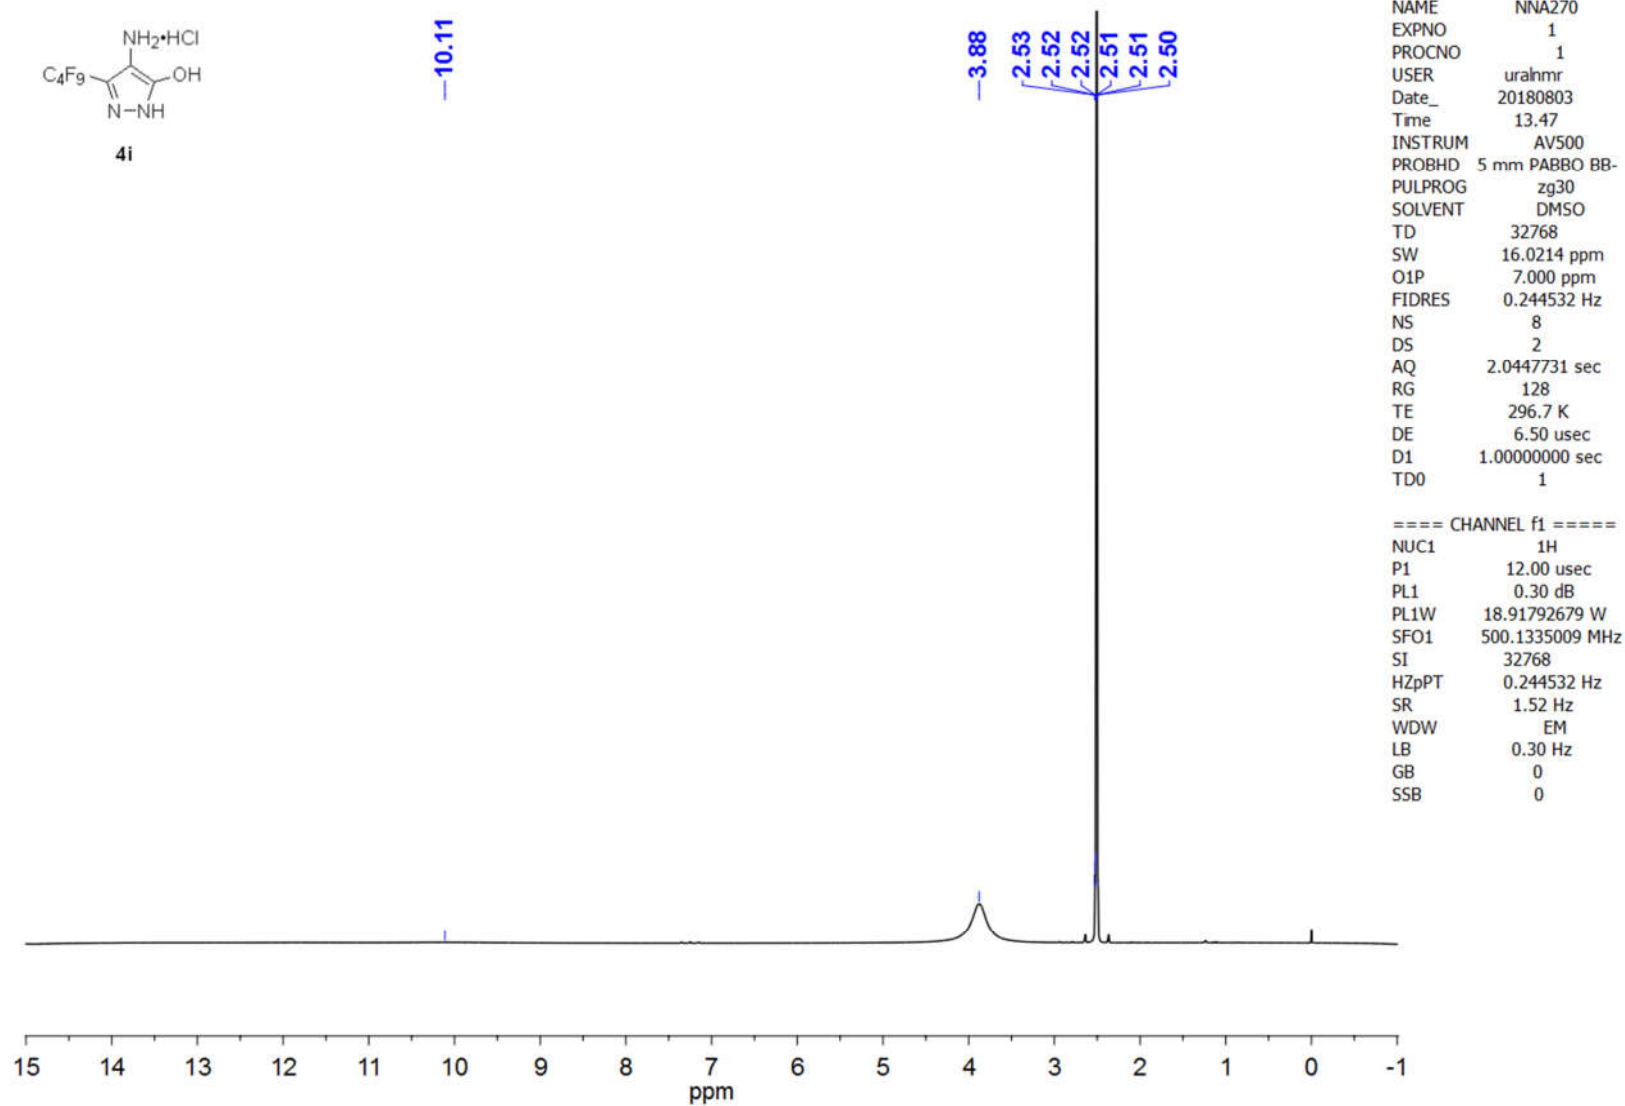

Figure S30.  $^{19}\text{F}$  NMR spectrum of 4-amino-3-(nonafluorobutyl)-1H-pyrazol-5-ol hydrate hydrochloride (**4i**).

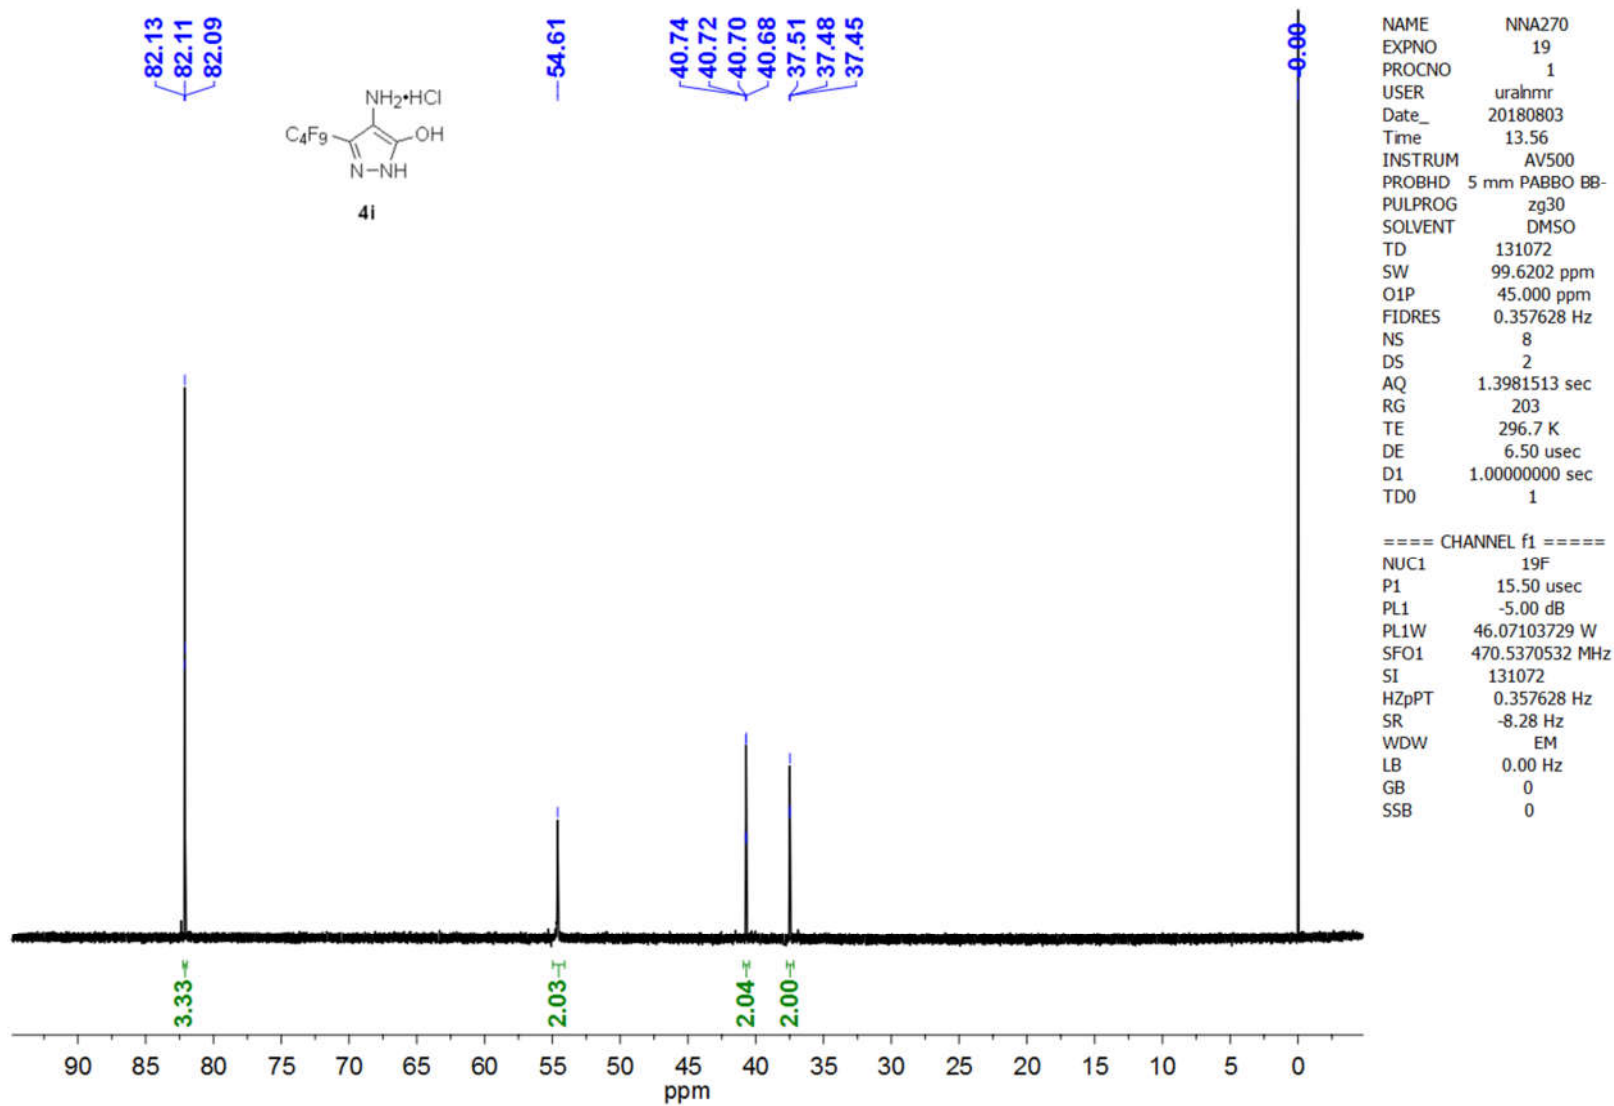

**Figure S31.**  $^1\text{H}$  NMR spectrum of 4-amino-3-methyl-1H-pyrazol-5-ol hydrochloride (**4j**).

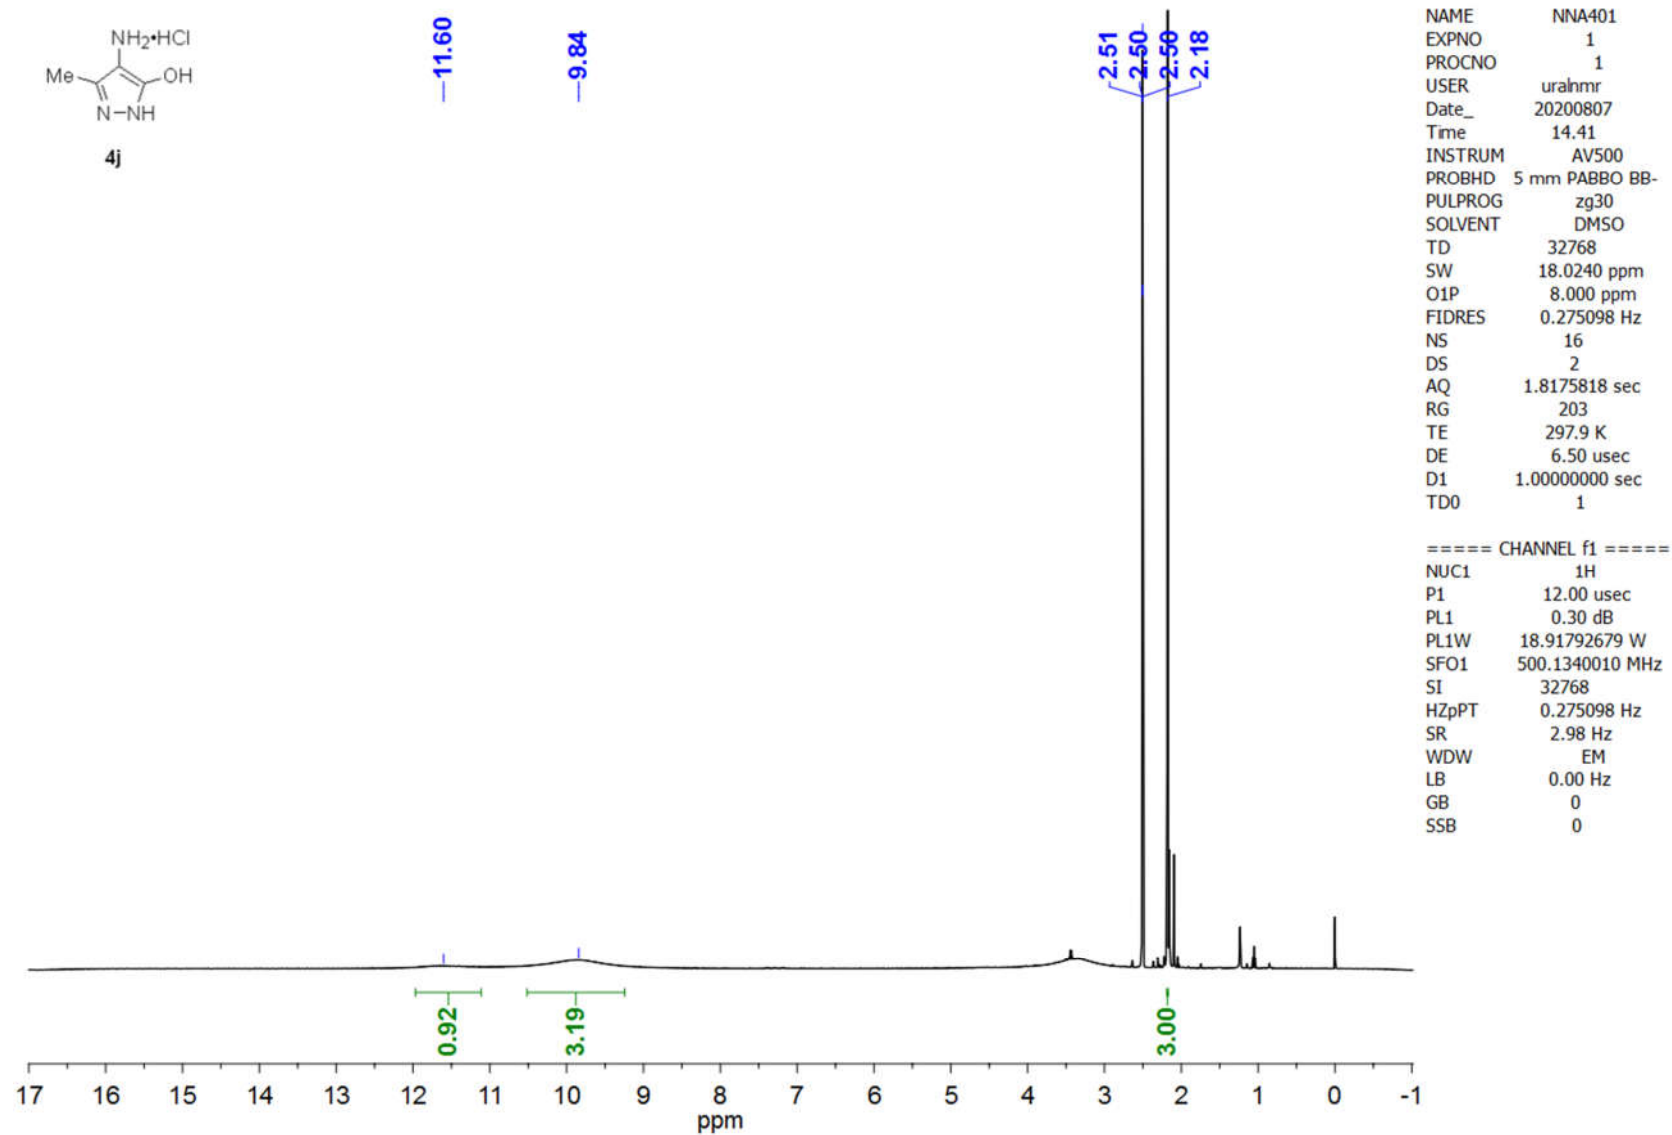

**Figure S32.**  $^{13}\text{C}$  NMR spectrum of 4-amino-3-methyl-1H-pyrazol-5-ol hydrochloride (**4j**).

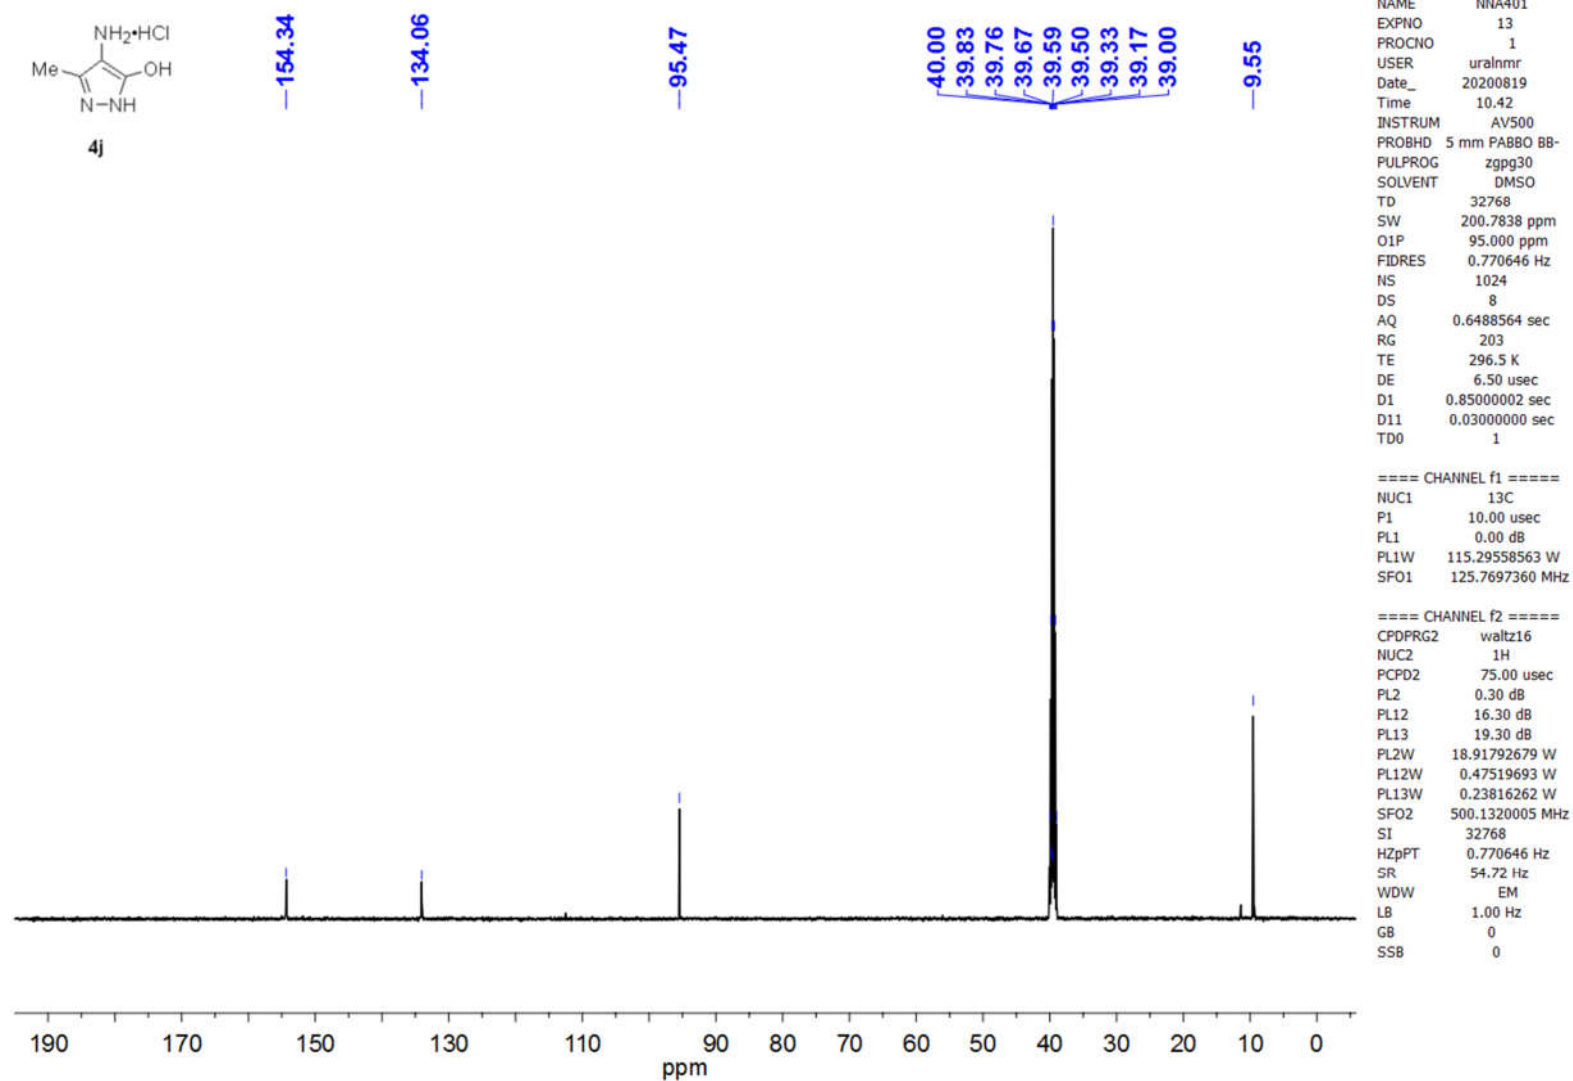

Supplement: s1 [file s1]
